# Supplementary material for: Temporal trends in the starting of insulin therapy in type 2 diabetes in Italy: data from the AMD Annals initiative
Source: Springer Nature journal article supplement (doi:10.1007/s40618-024-02306-5), 2024-03-05
Supplement: MOESM1 [file 40618_2024_2306_MOESM1_ESM.pdf]

## Centri partecipanti

| REGIONE | AUTORI                                                                                                                                                                                                                                        | OSPEDALE                                                                          | REPARTO                                                          | CITTA'                |
|---------|-----------------------------------------------------------------------------------------------------------------------------------------------------------------------------------------------------------------------------------------------|-----------------------------------------------------------------------------------|------------------------------------------------------------------|-----------------------|
| ABRUZZO | Valeria Montani,<br>Emanuela Cannarsa,<br>Paola Colleluori ,<br>Vincenzo Trosini,<br>Rosanna Pennetta ,<br>Martina Basilico                                                                                                                   | ASL di Teramo<br>Dipartimento<br>Discipline Mediche                               | UOSD Diabetologia<br>Atri                                        | Atri (TE)             |
| ABRUZZO | Deamaria Piersanti,<br>Barbara Macerola,<br>Elisabetta Di<br>Berardino, Alessia Di<br>Pietro, Loredana<br>Capaldi, Antonio Conti                                                                                                              | ASL 1 Abruzzo - P.O.<br>Avezzano                                                  | UOSD Diabetologia                                                | Avezzano (AQ)         |
| ABRUZZO | Elisabetta Straface,<br>Mario Grasso                                                                                                                                                                                                          | Distretto Sanitario di<br>Base di Casalbordino -<br>ASL Lanciano-Vasto-<br>Chieti | Ambulatorio<br>Diabetologicalisa                                 | Casalbordino (CH)     |
| ABRUZZO | Livia Santarelli,<br>Annamaria De Mutiis ,<br>Settimio D' Andrea,<br>Carla Scarsellato,<br>Antonietta Sciulli,<br>Carla Mennella                                                                                                              | Presidio Ospedaliero<br>Castel di Sangro                                          | UOSD di Diabetologia<br>- ASL1 Abruzzo Avezzano-Sulmona-L'Aquila | Castel di Sangro (AQ) |
| ABRUZZO | Carla Cinzia Carrabs,<br>Giulia Tartaro, Elena<br>Giampietro, Ester<br>Vitacolonna                                                                                                                                                            | Ospedale Clinicizzato<br>SS Annunziata                                            | Diabetologia del<br>Policlinico Chieti                           | Chieti (CH)           |
| ABRUZZO | Maria D'Aurizio                                                                                                                                                                                                                               | PTA Presidio<br>Territoriale di<br>Assistenza Gissi                               | Reparto di<br>Diabetologia                                       | Gissi (CH)            |
| ABRUZZO | Sara Nazzarena<br>Morgante, Antonella<br>Zugaro, Marco Giorgio<br>Baroni                                                                                                                                                                      | Ospedale San<br>Salvatore - L'Aquila<br>ASL 1 Abruzzo                             | Diabetologia e Malattie<br>Metaboliche                           | L'Aquila (AQ)         |
| ABRUZZO | Daniela Antenucci,<br>Fiore Pelliccione,<br>Tiziana Rapino,<br>Alessio Martorella ,<br>Annamaria Crognale,<br>Morena Di Paolo,<br>Graziella Martelli,<br>Pamela De Giosa ,<br>Giovanna Angelicola,<br>Ylenia Natarelli,<br>Angela Di Federico | Ospedale F. Renzetti,<br>ASL 2 Lanciano-Vasto-<br>Chieti                          | Diabetologia e Malattie<br>Metaboliche                           | Lanciano (CH)         |

| REGIONE  | AUTORI                                                                                                                         | OSPEDALE                                                                               | REPARTO                                             | CITTA'                 |
|----------|--------------------------------------------------------------------------------------------------------------------------------|----------------------------------------------------------------------------------------|-----------------------------------------------------|------------------------|
| ABRUZZO  | Agostino Consoli,<br>Gloria Formoso,<br>Giuliana La Penna,<br>Fabrizio Febo, Sara<br>Coluzzi                                   | AUSL Pescara<br>Ospedale Civile Santo<br>Spirito                                       | UOC Territoriale<br>Endocrinologia e<br>Metabolismo | Pescara (PE)           |
| ABRUZZO  | Angelo Cosimo Gioia,<br>Benedetta Martin                                                                                       | ASL Pescara Presidio<br>Ospedaliero di Popoli                                          | Ambulatorio<br>Diabetologia UOC<br>Medicina Interna | Popoli (PE)            |
| ABRUZZO  | Elisabetta Straface,<br>Concetta Racciatti                                                                                     | ASL Lanciano Vasto<br>Chieti                                                           | Ambulatorio<br>diabetologico Distretto<br>San Salvo | San Salvo (CH)         |
| ABRUZZO  | Rossella Romano,<br>Patrizia Di Fulvio,<br>Antonio Macrillante,<br>Maria Laura Daniele                                         | ASL 4 Teramo<br>Ospedale Val Vibrata                                                   | UOS Diabetologia                                    | Sant' Omero (TE)       |
| ABRUZZO  | Livia Santarelli,<br>Annamaria De Mutiis,<br>Luigina Ventresca,<br>Debora Gambina,<br>Giovanni Cavaliere,<br>Luigina Spadorcia | Ospedale Civile SS<br>Annunziata - ASL1<br>Abruzzo Avezzano-<br>Sulmona-L'Aquila       | U.O. di Diabetologia -<br>Sulmona                   | Sulmona (AQ)           |
| ABRUZZO  | Mariarosaria<br>Squadrone, Grazia<br>Giovanna Laverghetta,<br>Maria D'Aurizio,<br>Concetta Massa,<br>Donatella Luciani         | Nucleo Operativo<br>Distrettuale Vasto                                                 | Servizio Diabetologico<br>C/O Nod Vasto 1 piano     | Vasto (CH)             |
| ABRUZZO  | Marilena Olivieri                                                                                                              | Distretto Sanitario di<br>Base di Villa Santa<br>Maria - ASL Lanciano-<br>Vasto-Chieti | Ambulatorio di<br>Diabetologia e<br>Endocrinologia  | Villa Santa Maria (CH) |
| CALABRIA | Paola Sarnelli, Luigi<br>Puccio                                                                                                | Azienda Ospedaliera<br>Pugliese-Ciaccio                                                | SOC Diabetologia -<br>Endocrinologia                | Catanzaro (CZ)         |
| CALABRIA | Rosanna Piro                                                                                                                   | Ospedale San<br>Francesco di Paola                                                     | Reparto di<br>Diabetologia                          | Paola (CS)             |
| CALABRIA | Eugenio Alessi,<br>Concetta Nadia Aricò,<br>Desiree Cannizzaro,<br>Claudia Ferraro, Maria<br>Angela Sculli                     | A.O. Bianchi<br>Melacrino Morelli<br>Presidio Ospedaliero<br>Morelli                   | UOC Diabetologia ed<br>Endocrinologia               | Reggio Calabria (RC)   |
| CALABRIA | Celestino Giovannini,<br>Daniela Cristiano,<br>Fortunata Pontari                                                               | ASP 5 Reggio Calabria<br>Polo Sanitario Nord                                           | Servizio di<br>Diabetologia                         | Reggio Calabria (RC)   |
| CALABRIA | Giovanni Perrone,<br>Alessandra Paris Paris                                                                                    | Polo Sanitario RC-Sud<br>ASP 5                                                         | Servizio Territoriale di<br>Diabetologia            | Reggio Calabria (RC)   |

| REGIONE  | AUTORI                                                                                                                                                                  | OSPEDALE                                                        | REPARTO                                        | CITTA'                               |
|----------|-------------------------------------------------------------------------------------------------------------------------------------------------------------------------|-----------------------------------------------------------------|------------------------------------------------|--------------------------------------|
| CALABRIA | Anton Giulio Ametrano, Alfonso Mele, Mariagrazia Restuccia, Mariangela Rubino, Delia Francesca Carbotti, Giuseppe Armentano                                             | Centro Diabetologico DEA - ASP Cosenza                          | Accreditato SSN - ASP Cosenza                  | Rossano Calabro (CS)                 |
| CAMPANIA | Franca Serino, Andrea Del Buono                                                                                                                                         | Centro Diabetologico di Cellole ASL Caserta Distretto 14        | Centro Diabetologico di Cellole                | Cellole (CE)                         |
| CAMPANIA | Maria Carmen Passariello, Mario Laudato                                                                                                                                 | ASL Caserta Distretto Sanitario 13 - Maddaloni                  | Ambulatorio di diabetologia                    | Maddaloni/San Felice A Cancellò (CE) |
| CAMPANIA | Claudio Lambiase, Teresa Di Vece, Luigi Sardelli, Gabriella Nosso, Luigi Gargiulo, Maurizio Mauriello, Massimo Fezza, Carmela Giordano, Flora Leo, Linda D'Amato        | Ospedale Curteri G. Amico DS 67 - ASL SA                        | Centro Diabetologico DS 67 Mercato S. Severino | Mercato S. Severino (SA)             |
| CAMPANIA | Stefano De Riu                                                                                                                                                          | ASL NA 1 - Distretto sanitario 33                               |                                                | Napoli (NA)                          |
| CAMPANIA | Adriano Gatti                                                                                                                                                           | Presidio Ospedaliero San Gennaro - ASL NA1 Centro               | Centro di Diabetologia 4 Piano                 | Napoli (NA)                          |
| CAMPANIA | Claudio Lambiase, Stefano Masi, Andrea Renzullo, Lea Lo Conte, Giovanni Carella, Anna Nasti, Carmela Peluso, Lucia D'Elia, Ylenia Nicole Pellegrino, Vincenzo De Caprio | Asl di Salerno                                                  | C.D.A. Distretto Sanitario Nocera Inferiore    | Nocera Inferiore (SA)                |
| CAMPANIA | Emilia Martedi'                                                                                                                                                         | Centro Diagnostico San Ciro                                     | Centro AID Portici                             | Portici (NA)                         |
| CAMPANIA | Gelsomina Capuano, Alessandra Cantillo, Lea Lo Conte, Giovanni Attanasio                                                                                                | ASL Salerno Centro Diabetologico Distretto 66 Ospedale Vernieri | Centro Diabetologico                           | Salerno (SA)                         |
| CAMPANIA | Francesca Innelli, Angela Cassese, Piera Grammaldo, Angelo Vistocco, Valentino De Stefano, Luigi Scevola,                                                               | Ambulatorio Diabetologia Distretto Sanitario 70                 | Ambulatorio Diabetologia                       | Vallo della Lucania (SA)             |

| REGIONE        | AUTORI                                                                                                                                                                                                                                             | OSPEDALE                                                         | REPARTO                                                 | CITTA'                       |
|----------------|----------------------------------------------------------------------------------------------------------------------------------------------------------------------------------------------------------------------------------------------------|------------------------------------------------------------------|---------------------------------------------------------|------------------------------|
|                | Angela Cetrangolo,<br>Emanuela Petraglia                                                                                                                                                                                                           |                                                                  |                                                         |                              |
| EMILIA ROMAGNA | Gilberto Laffi, Pagotto<br>Uberto , Michele<br>Salvatore Grimaldi,<br>Valentina Lo Preiato,<br>Simona Moscatiello,<br>Danilo Ribichini                                                                                                             | AOU di Bologna<br>Policlinico S. Orsola<br>Malpighi              | Unita' Operativa di<br>Diabetologia                     | Bologna (BO)                 |
| EMILIA ROMAGNA | Ugo Aldo Pagliani ,<br>Monica Camporesi,<br>Giorgia Prampolini,<br>Marzia Turilli, Licia<br>Notari                                                                                                                                                 | Ospedale di<br>Castelnovo ne Monti                               | Diabetologia                                            | Castelnovo ne' Monti<br>(RE) |
| EMILIA ROMAGNA | Vincenzo Monda                                                                                                                                                                                                                                     | Ospedale di Cento -<br>Casa della Comunità di<br>Bondeno         | UOC Diabetologia<br>Territoriale AUSL<br>Ferrara        | Cento - Bondeno (FE)         |
| EMILIA ROMAGNA | Diletta Ugolotti, Elisa<br>Usberti                                                                                                                                                                                                                 | AUSL Parma<br>Ambulatorio Casa<br>della Salute Collecchio        | Ambulatori<br>Diabetologici Distretto<br>Sud - Est      | Collecchio (PR)              |
| EMILIA ROMAGNA | Carlo Percudani                                                                                                                                                                                                                                    | AUSL PARMA Polo<br>Sanitario di Colorno                          | Ambulatorio<br>Diabetologico                            | Colorno (PR)                 |
| EMILIA ROMAGNA | Elisabetta Bergami                                                                                                                                                                                                                                 | Ospedale di<br>Comacchio - Casa<br>della Comunità di<br>Codigoro | UOC Diabetologia<br>Territoriale AUSL<br>Ferrara        | Comacchio - Codigoro<br>(FE) |
| EMILIA ROMAGNA | Anna Rita Carli                                                                                                                                                                                                                                    | Casa della Comunità di<br>Copparo                                | UOC Diabetologia<br>Territoriale AUSL<br>Ferrara        | Copparo (FE)                 |
| EMILIA ROMAGNA | Bruna Milli, Silvia<br>Pilla, Petros<br>Tsamatropoulos, Giulia<br>Bellei, Daniela Di<br>Renzo, Marinella<br>Angeli, Annalisa Iotti,<br>Elena Carboni, Paola<br>Caretta, Valeria<br>Vezzani, Morena<br>Marmiroli, Susanna<br>Rovesti, Elisa Monzali | Ospedale di Correggio                                            | Diabetologia                                            | Correggio (RE)               |
| EMILIA ROMAGNA | Maria Simona Termine                                                                                                                                                                                                                               | PO di Faenza - AUSL<br>della Romagna                             | UO Diabetologia<br>Ravenna/Faenza, Dip.<br>Internistico | Faenza (RA)                  |
| EMILIA ROMAGNA | Marcello Monesi,<br>Francesca Lugli, Bellio<br>Mariaenrica, Serena<br>Galvan, Elisa Dinatolo                                                                                                                                                       | Casa della Comunità<br>"Cittadella San Rocco"<br>Ferrara         | UOC Diabetologia<br>Territoriale AUSL<br>Ferrara        | Ferrara (FE)                 |

| REGIONE        | AUTORI                                                                                                                                                                                                               | OSPEDALE                                                                                  | REPARTO                                                              | CITTA'          |
|----------------|----------------------------------------------------------------------------------------------------------------------------------------------------------------------------------------------------------------------|-------------------------------------------------------------------------------------------|----------------------------------------------------------------------|-----------------|
| EMILIA ROMAGNA | Elisa Gatti, Nicoletta Orlandi, Antonella Guberti                                                                                                                                                                    | Ospedale di Fidenza                                                                       | U.O.Medicina Interna                                                 | Fidenza (PR)    |
| EMILIA ROMAGNA | Bruna Milli, Silvia Pilla, Giulia Bellei, Petros Tsamatropoulos, Paola Caretta, Daniela Di Renzo, Valeria Vezzani, Morena Marmiroli, Susanna Rovesti, Elisa Monzali, Marinella Angeli, Annalisa Iotti, Elena Carboni | Ospedale di Guastalla                                                                     | Diabetologia                                                         | Guastalla (RE)  |
| EMILIA ROMAGNA | Rita Manini, Anna Vacirca                                                                                                                                                                                            | Ospedale Civile Nuovo di Imola                                                            | Dipartimento Medico Oncologico                                       | Imola (BO)      |
| EMILIA ROMAGNA | Diletta Ugolotti, Elisa Usberti, Sonia Erta, Tiziana Cadossi, Daniela Pedrini                                                                                                                                        | Ausl Parma Ambulatorio Casa della Salute di Langhirano                                    | Ambulatorio Diabetologia                                             | Langhirano (PR) |
| EMILIA ROMAGNA | Alessandra Luberto                                                                                                                                                                                                   | PO di Lugo - AUSL della Romagna                                                           | UO Diabetologia Ravenna/Lugo, Dip. Internistico                      | Lugo (RA)       |
| EMILIA ROMAGNA | Massimo Michelini, Rosa Maria Trianni, Elena Capuano, Francesca Borghi, Fiorenza Delloste, Serena Davoli, Marika Iemmi, Paola Pedrini, Monica Ronchetti, Annalisa Tagliavini, Paola Ferrari                          | Ospedale di Montecchio                                                                    | Diabetologia                                                         | Montecchio (RE) |
| EMILIA ROMAGNA | Alessandra Dei Cas, Riccardo Bonadonna, Raffaella Aldigeri, Monica Antonini, Angela Vazzana, Valentina Moretti                                                                                                       | AOUPR Azienda Ospedaliera Universitaria Parma - Dip. di Medicina generale e specialistica | UOC di Endocrinologia e Malattie del metabolismo                     | Parma (PR)      |
| EMILIA ROMAGNA | Diletta Ugolotti, Clelia Di Secli, Antonella Guberti                                                                                                                                                                 | AUSL Parma Polo Sanitario Pintor Molinetto Parma                                          | Ambulatorio Diabetologico                                            | Parma (PR)      |
| EMILIA ROMAGNA | Silvia Haddoub, Michele Riva, Maria Grazia Magotti, Maria Maddalena Micheli                                                                                                                                          | Azienda Ospedaliero-Universitaria di Parma                                                | Reparto di Trattamento intensivo Del Diabete e delle sue Complicanze | Parma (PR)      |
| EMILIA ROMAGNA | Biagio Oliviero                                                                                                                                                                                                      | Ospedale di Argenta -                                                                     | UOC Diabetologia                                                     | Portomaggiore - |

| REGIONE               | AUTORI                                                                                                                                                                                                                                                                                                                                    | OSPEDALE                                                                                                               | REPARTO                                   | CITTA'                     |
|-----------------------|-------------------------------------------------------------------------------------------------------------------------------------------------------------------------------------------------------------------------------------------------------------------------------------------------------------------------------------------|------------------------------------------------------------------------------------------------------------------------|-------------------------------------------|----------------------------|
|                       |                                                                                                                                                                                                                                                                                                                                           | Casa della Comunità di Portomaggiore                                                                                   | Territoriale AUSL Ferrara                 | Argenta (FE)               |
| EMILIA ROMAGNA        | Paolo Di Bartolo, Francesca Pellicano, Cipriana Sardu, Chiara Caselli, Mazzotti Arianna                                                                                                                                                                                                                                                   | AUSL della Romagna                                                                                                     | REPARTO DI DIABETOLOGIA                   | Ravenna (RA)               |
| EMILIA ROMAGNA        | Romina Amodeo, Lisa Bonilauri, Maria Cardaci, Eliana Gardini, Alessandro Lo Ioco, Roberta Lunghi, Laura Lombardi, Susanna Gelosini, Elisa Manicardi, Maria Gloria Mercati, Rita Montedoro, Roberta Prandi, Sara Pingani, Prisco Sbordone, Rosa Maria Trianni, Miriam Parisi, Francesca Palmieri, Marta Ghinelli, Eles Notari, Elisa Berri | Casa della Salute, Distretto di Reggio Emilia                                                                          | Diabetologia                              | Reggio Emilia (RE)         |
| EMILIA ROMAGNA        | Ugo Aldo Pagliani, Monica Camporesi, Alfredo Zappavigna, Antonella Rabitti, Anna Maria Ferraioli, Susanna Valenti, Simona Bodecchi                                                                                                                                                                                                        | AUSL di Reggio Emilia-Ospedale di Scandiano                                                                            | Diabetologia                              | Scandiano (RE)             |
| EMILIA ROMAGNA        | Elisa Usberti, Diletta Ugolotti, Daniela Pedrini                                                                                                                                                                                                                                                                                          | AUSL Parma Ambulatorio casa della Salute di Traversetolo                                                               | Ambulatorio di Diabetologia               | Traversetolo (PR)          |
| FRIULI VENEZIA GIULIA | Mario Velussi                                                                                                                                                                                                                                                                                                                             | Casa di Cura Pineta del Carso                                                                                          | Ambulatorio di Diabetologia               | Aurisina (TS)              |
| FRIULI VENEZIA GIULIA | Giuseppe Felace, Manola Nicoletti, Daria Albini, Fabrizio Santoro, Elisa Norio, Lorj Mongiat, Maria Elena Salvador, Nicoletta Petracco                                                                                                                                                                                                    | ASFO (Azienda Sanitaria Friuli Occidentale) Ospedale S. Maria dei Battuti di San Vito al Tagliamento - sede di Maniago | Ambulatorio Diabetologico                 | Maniago (PN)               |
| FRIULI VENEZIA GIULIA | Paolo Bordin, Luciana Dotto, Maurizio Sancandi, Elena Rossa                                                                                                                                                                                                                                                                               | AAS n.3 Alto Friuli - Collinare-Medio Friuli O.C. Sant' Antonio                                                        | Ambulatorio di Diabetologia - UO Medicina | S. Daniele del Friuli (UD) |
| FRIULI VENEZIA GIULIA | Patrizia Li Volsi, Paola Pusiol                                                                                                                                                                                                                                                                                                           | Ospedale Civile Di Sacile AAS5                                                                                         | Reparto di Diabetologia                   | Sacile (PN)                |

| REGIONE               | AUTORI                                                                                                                                                                                                                                                                                                | OSPEDALE                                                                                      | REPARTO                       | CITTA'                       |
|-----------------------|-------------------------------------------------------------------------------------------------------------------------------------------------------------------------------------------------------------------------------------------------------------------------------------------------------|-----------------------------------------------------------------------------------------------|-------------------------------|------------------------------|
|                       |                                                                                                                                                                                                                                                                                                       | Pordenone                                                                                     |                               |                              |
| FRIULI VENEZIA GIULIA | Manola Nicoletti, Martina Grando, Giuseppe Felace, Rita Centis                                                                                                                                                                                                                                        | Azienda Ospedaliera Universitaria S. Maria della Misericordia sede di San Vito al Tagliamento | Ambulatorio di Diabetologia   | San Vito al Tagliamento (PN) |
| FRIULI VENEZIA GIULIA | Giuseppe Felace, Daria Albini, Fabrizio Santoro, Massimo Rondana, Agnese Fasano, Ilenia Donaduzzi, Tiziana Del Savio                                                                                                                                                                                  | ASFO (Azienda Sanitaria Friuli Occidentale) - Presidio Ospedaliero S.Giovanni dei Battuti     | Ambulatorio di Diabetologia   | Spilimbergo (PN)             |
| FRIULI VENEZIA GIULIA | Riccardo Candido, Anna Vittoria Ciardullo, Chiara Gottardi, Elena Manca, Alessandra Petrucco, Michela Casson, Elisabetta Tommasi, Katja Tercej, Augusta Toso, Silvana Cum, Elisa Del Forno, Elena Mellini, Veronica Fragiaco, Fabrizia Banello, Anna Maria Valiani, Alessandra Bresciani, Cinzia Sain | Azienda Sanitaria Universitaria Giuliano Isontina                                             | S.S. Centro Diabetologico     | Trieste (TS)                 |
| FRIULI VENEZIA GIULIA | Silvia Galasso, Sandra Agus, Maria Carpentieri, Silvia Maria Sciannimanico, Antonio Stefano Salcuni, Cristina Sartori, Francesca Vidotti, Graziana Fabbro, Rita Brovedani, Angela Retugliano, Anna Rita Paccini, Giovanna Cassan, Lucia Caputo, Marina Armellini                                      | Azienda Sanitaria Universitaria Friuli Centrale (ASUFC)                                       | SOC di Endocrinologia - ASUFC | Udine (UD)                   |
| LAZIO                 | Claudio Grande                                                                                                                                                                                                                                                                                        | ASL Viterbo - Ospedale di Acquapendente                                                       | Ambulatorio di diabetologia   | Acquapendente (VT)           |
| LAZIO                 | Grazia Pia Ricciardi                                                                                                                                                                                                                                                                                  | ASL Latina Distretto 1 Aprilia                                                                | Servizio diabetologia         | Aprilia (LT)                 |
| LAZIO                 | Maria Cristina Ribaudò, Laura Proietti                                                                                                                                                                                                                                                                | ASL RM 4                                                                                      | Diabetologia                  | Capena (RM)                  |

| REGIONE | AUTORI                                                                                                                                                                                                                                            | OSPEDALE                                                 | REPARTO                                                               | CITTA'             |
|---------|---------------------------------------------------------------------------------------------------------------------------------------------------------------------------------------------------------------------------------------------------|----------------------------------------------------------|-----------------------------------------------------------------------|--------------------|
|         | Pannunzi, Daniele<br>Follieri , Maria Paola<br>Laria , Elisabetta<br>Meloni, Stefania<br>Ciriello, Anna<br>Lorenzetti                                                                                                                             |                                                          |                                                                       |                    |
| LAZIO   | Graziano Santantonio,<br>Alessandra<br>Zappaterreno, Lucrezia<br>Russo, Olimpia<br>Bitterman, Lina<br>Lottatori, Elisa<br>Costanzo, Debora<br>Fabbretti, Valentina<br>Arezzini, Valeria De<br>Persio, Valentina Di<br>Fiordo, Daniele<br>Follieri | Presidio Ospedaliero<br>San Paolo -<br>Civitavecchia     | U.O.S.D. Diabetologia                                                 | Civitavecchia (RM) |
| LAZIO   | Roberta Gaudioso,<br>Vittoria Vaccari                                                                                                                                                                                                             | ASL Roma 5 -<br>Ospedale di Colferro                     | UOC Medicina Interna<br>e Geriatria<br>Ambulatorio di<br>Diabetologia | Colferro (RM)      |
| LAZIO   | Francesco De Meo,<br>Elisa Forte, Daniela<br>Fiore, Generosa<br>Pannozzo                                                                                                                                                                          | Ospedale di Fondi                                        | Reparto di<br>Diabetologia                                            | Fondi (LT)         |
| LAZIO   | Francesco De Meo,<br>Elisa Forte, Rossella<br>Fabiano, Daniela Fiore,<br>Claudia Iannone                                                                                                                                                          | Presidio Ospedaliero di<br>Gaeta                         | SC Diabetologia ed<br>Endocrinologia                                  | Gaeta (LT)         |
| LAZIO   | Raffaele Scalpone ,<br>Patrizio Tatti, Gregorio<br>Versace                                                                                                                                                                                        | INI Istituto<br>Neurotraumatologico<br>Italiano          | Ambulatorio di<br>Diabetologia/Reparto<br>di Medicina Generale        | Grottaferrata (RM) |
| LAZIO   | Lorena Mancini, Giulia<br>Bassotti, Danuta<br>Wolosinska, Gloria<br>Cornacchiola, Di<br>Biagio Debora,<br>Donnino Rita, Vallesi<br>Celeste, Follieri<br>Daniele, Di Fiordo<br>Valentina                                                           | ASL Roma 4 - Casa<br>della Salute<br>Ladispoli/Cerveteri | Diabetologia                                                          | Ladispoli (RM)     |
| LAZIO   | Angela Carlone,<br>Alessandra Di<br>Flaviani, Claudio<br>Caccamo , Alessia<br>Ventricini , Lucia<br>Fontana                                                                                                                                       | ACISMOM LATINA                                           | Centro Diabetologico<br>Latina                                        | Latina (RM)        |



| REGIONE | AUTORI                                                                                                                                                                                                                                                                            | OSPEDALE                                                | REPARTO                                | CITTA'      |
|---------|-----------------------------------------------------------------------------------------------------------------------------------------------------------------------------------------------------------------------------------------------------------------------------------|---------------------------------------------------------|----------------------------------------|-------------|
| LAZIO   | Frida Leonetti                                                                                                                                                                                                                                                                    | Ospedale Santa Maria Goretti                            | UOC di Diabetologia Universitaria      | Latina (RM) |
| LAZIO   | Anna Rita Aleandri, Silvia Caprioli, Giuseppina Beretta Anguissola, Maria Virginia Guidi, Fabrizia Toscanella, Maria Grazia Pipitone, Maria Rosaria Faraglia, Verena Lilli, Cristina Giagnoli, Michela Di Venanzio, Maria Cristina Raggi, Eleonora Pomponi                        | Ospedale San Camillo De Lellis -ASL Rieti               | Medicina 2 - Diabetologia              | Rieti (RI)  |
| LAZIO   | Maria Letizia Bruschi, Loredana Pomponi                                                                                                                                                                                                                                           | Ambulatorio Diabetologia ASL Roma 2                     | Ambulatorio Diabetologia               | Roma (RM)   |
| LAZIO   | Ernesto Maddaloni, Chiara Moretti, Luca D'Onofrio, Carmen Mignogna, Antonio Siena, Raffaella Buzzetti                                                                                                                                                                             | Azienda Ospedaliera Universitaria Policlinico Umberto I | UOD di Diabetologia                    | Roma (RM)   |
| LAZIO   | Paola D'Angelo, Angela Del Prete, Teresa Mondello, Severino Malizia, Salvatore Valentino, Maria Altomare, Santina Abbruzzese, Silvia Carletti, Roberta Lancione, Teresa Di Fiore, Veronica Tamburri, Marianna Battimelli, Daniela Finora, Gabriella Ceccarelli, Roberto Gagliardi | Ospedale Sandro Pertini                                 | UO-Diabetologia                        | Roma (RM)   |
| LAZIO   | Alessandra Di Flaviani, Stefania Angotti, Barbara Carabba, Maddalena Ragazzo, Sara Sterpetti, Francesco Saverio Floridi                                                                                                                                                           | ACISMOM Palmiro Togliatti                               | Centro Diabetologico Palmiro Togliatti | Roma (RM)   |
| LAZIO   | Valentina Izzo, Alessandra Di Flaviani, Rossella                                                                                                                                                                                                                                  | ACISMOM CONCORDIA                                       | Centro Diabetologico Concordia         | Roma (RM)   |

| REGIONE | AUTORI                                                                                                                                                                                                                                                                        | OSPEDALE                                                              | REPARTO                                                                    | CITTA'    |
|---------|-------------------------------------------------------------------------------------------------------------------------------------------------------------------------------------------------------------------------------------------------------------------------------|-----------------------------------------------------------------------|----------------------------------------------------------------------------|-----------|
|         | Fabiano , Stefano<br>Colangelo , Roberto<br>Gagliardi , Caterina<br>Saponara , Leonardo<br>Lancia , Fabio Colletti                                                                                                                                                            |                                                                       |                                                                            |           |
| LAZIO   | Roberta Pisano, Maria<br>Cristina Gentile, Diana<br>Corradini, Sofia De<br>Taddeo, Francesca<br>Piccirilli, Maria Neve                                                                                                                                                        | ACISMOM NEGRO                                                         | Centro Diabetologico<br>Camillo Negro                                      | Roma (RM) |
| LAZIO   | Danila Fava, Maria<br>Cassone Faldetta,<br>Fulvia De Luca,<br>Assunta Santonati,<br>Giuliana Leacche,<br>Anna Conidi, Cristina<br>Sacchini, Rossella<br>Guarino, Vanessa<br>Maini, Valentina<br>Perfili, Anna Tesei                                                           | A.O. S. Giovanni<br>Addolorata Presidio<br>Ospedaliero Santa<br>Maria | UOSD Endocrinologia<br>e Diabetologia                                      | Roma (RM) |
| LAZIO   | Simona Frontoni,<br>Fabiana Picconi,<br>Patrizia Borboni,<br>Federica De Marco,<br>Marika Menduni,<br>Alessio Maiorino,<br>Sofia De Taddeo,<br>Benedetta Russo,<br>Daniela Ceccaroni,<br>Giuseppe Vancieri,<br>Valentina Tommasi                                              | Ospedale<br>Fatebenefratelli Isola<br>Tiberina - Gemelli<br>Isola     | UOC Endocrinologia,<br>Diabetologia e Malattie<br>Metaboliche              | Roma (RM) |
| LAZIO   | Andrea Giaccari,<br>Teresa Mezza,<br>Francesca Cinti,<br>Gianfranco Di<br>Giuseppe, Umberto<br>Capece, Gea Ciccarelli,<br>Michela Brunetti,<br>Laura Soldovieri,<br>Valentina Fragale,<br>Ilaria Improta, Flavia<br>Impronta, Chiara<br>Maria Assunta Cefalo,<br>Simona Moffa | Fondazione Policlinico<br>Agostino Gemelli<br>IRCCS                   | Centro per le malattie<br>endocrine e<br>metaboliche                       | Roma (RM) |
| LAZIO   | Susanna Morano,<br>Tiziana Filardi,<br>Vittorio Venditti,<br>Enrico Bleve, Maria<br>Cristina Gentile,<br>Antonella Valente                                                                                                                                                    | Policlinico Umberto I,<br>Sapienza Universita' di<br>Roma             | Dipartimento di<br>Medicina Sperimentale<br>UOS Complicanze del<br>diabete | Roma (RM) |

| REGIONE | AUTORI                                                                                                                                                                                                                                                                                                                             | OSPEDALE                                     | REPARTO                                                 | CITTA'    |
|---------|------------------------------------------------------------------------------------------------------------------------------------------------------------------------------------------------------------------------------------------------------------------------------------------------------------------------------------|----------------------------------------------|---------------------------------------------------------|-----------|
| LAZIO   | Lelio Morviducci,<br>Daniela Cappelloni,<br>Anna Ciarmatori, Lina<br>Lardieri, Ilaria<br>Giordani, Tiziana<br>Santucci, Gabriella Del<br>Monte, Franca Rauseo,<br>Patrizia Alini, Daniela<br>Chiodi, Catia<br>Pietrangeli, Maria<br>Elena Antonazzi ,<br>Romina Di Mauro,<br>Claudia Brufani                                       | Azienda Ospedaliera<br>San Filippo Neri      | U.O.D. Diabetologia                                     | Roma (RM) |
| LAZIO   | Lelio Morviducci,<br>Renato Giordano,<br>Maria Giuseppina<br>Migneco, Mauro<br>Rossini, Elettra<br>Santarelli, Natalia<br>Visalli, Giovanna<br>Liberati, Ida La Cesa,<br>Patrizia Cortesi,<br>Orietta Pannozzo,<br>Umberto Gazzarini,<br>Claudia Leonoro,<br>Romina Ralli ,<br>Samanta Roma,<br>Claudia Righini, Bruna<br>Facchini | Ospedale Santo Spirito                       | U.O.C. Diabetologia                                     | Roma (RM) |
| LAZIO   | Lelio Morviducci,<br>Fabiana Lanti, Sabrina<br>Spera, Enrica<br>Salomone, Cinzia<br>Riccobono, Marco<br>Pietrantoni, Roberta La<br>Rosa, Anna D'Ubaldi                                                                                                                                                                             | Ospedale Nuovo<br>Regina Margherita          | U.O.C. Diabetologia                                     | Roma (RM) |
| LAZIO   | Francesco Sabetta,<br>Concetta Suraci,<br>Sabrina Braucci, Laura<br>Borgognoni, Antonella<br>Caroli, Fabiana Trulli,<br>Patrizia Galante ,<br>Gloriana Bergami,<br>Letizia Mariani                                                                                                                                                 | Eurosanita' S.p.A. -<br>Policlinico Casilino | Ambulatorio di<br>Diabetologia - UO<br>Medicina Interna | Roma (RM) |
| LAZIO   | Maria Rosaria<br>Nardone, Claudio<br>Tubili, Angelo Lauria<br>Pantano                                                                                                                                                                                                                                                              | AO San Camillo<br>Forlanini                  | UOSD Diabetologia                                       | Roma (RM) |
| LAZIO   | Luigi Uccioli, Pasquale<br>Di Perna, Chiara                                                                                                                                                                                                                                                                                        | Ospedale CTO                                 | UOC Endocrinologia e<br>Malattie Metaboliche            | Roma (RM) |

| REGIONE | AUTORI                                                                                                                                                                                                                   | OSPEDALE                                             | REPARTO                                              | CITTA'         |
|---------|--------------------------------------------------------------------------------------------------------------------------------------------------------------------------------------------------------------------------|------------------------------------------------------|------------------------------------------------------|----------------|
|         | Pecchioli, Patrizia Sperti                                                                                                                                                                                               |                                                      |                                                      |                |
| LAZIO   | Claudio Ventura, Vittoria Bonato, Marzia Bongiovanni, Esmeralda Borrello, Emma Condorelli, Angela Napoli, Sabrina Coen                                                                                                   | Ospedale Israelitico                                 | U.O.S. Endocrinologia e M. Metaboliche               | Roma (RM)      |
| LAZIO   | Francesco Malci, Anita De Ciocchis, Paolo Martini, Manuela Fiducia                                                                                                                                                       | ASL RM G Presidio Ospedaliero A. Angelucci - Subiaco | Medicina Interna                                     | Subiaco (RM)   |
| LAZIO   | Paolo Fiorentini                                                                                                                                                                                                         | ASL Viterbo - Ospedale di Tarquinia                  | Ambulatorio di diabetologia                          | Tarquinia (VT) |
| LAZIO   | Francesco De Meo, Elisa Forte , Daniela Fiore , Anna Pacilio                                                                                                                                                             | Ospedale di Terracina Latina                         | Reparto di Diabetologia                              | Terracina (LT) |
| LAZIO   | Vincenzo Fiore, Alessandra Barucca, Giovanni Carbotta, Alberico Giustini, Antonella Poggi, Maurizio Palmieri, Cinzia Sforza, Dionisia Carinella, Antonio Angelucci, Anna De Paolis, Antonella Di Pasquali, Sonia Barraco | ASL Roma 5                                           | UOSD Diabetologia - Endocrinologia                   | Tivoli (RM)    |
| LAZIO   | Michela Dainelli, Alessandra Di Flaviani, Lucia Fontana                                                                                                                                                                  | ACISMOM Centro Diabetologico Di Viterbo              | Centro Diabetologico di Viterbo                      | Viterbo (VT)   |
| LAZIO   | Paolo Fiorentini, Claudia Arnaldi, Venanzi Susanna, Anna Montebove, Simona Vincenti, Cinzia Fiorillo, Barbara Longo, Alfonsina Chiefari, Claudio Grande, Tittania Musella, Davide Tosini                                 | ASL Viterbo                                          | Centro Diabetologico Aziendale                       | Viterbo (VT)   |
| LIGURIA | Eleonora Ambrosetti, Micaela Battistini, Francesca Cecoli,                                                                                                                                                               | ASL 3 Genovese                                       | SSD Diabetologia Endocrinologia Malattie Metaboliche | Arenzano (GE)  |

| REGIONE | AUTORI                                                                                                                                                                                                                                                                                                                                              | OSPEDALE                                             | REPARTO                                                     | CITTA'        |
|---------|-----------------------------------------------------------------------------------------------------------------------------------------------------------------------------------------------------------------------------------------------------------------------------------------------------------------------------------------------------|------------------------------------------------------|-------------------------------------------------------------|---------------|
|         | Arianna Cesarone,<br>Paola Angela Cichero,<br>Enrico Torre,<br>Francesca Fabbri,<br>Francesca Annunziata,<br>Giovanni Careddu,<br>Laura Veronica<br>Camerieri, Miryam<br>Talco, Eleonora Monti,<br>Maurizio Patrone,<br>Roberta Guido, Valeria<br>Ghigliotti, Alberto<br>Rebora                                                                     |                                                      |                                                             |               |
| LIGURIA | Paola Ponzani, Maria<br>Rosaria Falivene,<br>Danilo Conti                                                                                                                                                                                                                                                                                           | ASL 4 Liguria                                        | SSD Diabetologia e<br>Malattie Metaboliche                  | Chiavari (GE) |
| LIGURIA | Eleonora Ambrosetti,<br>Micaela Battistini,<br>Francesca Cecoli,<br>Arianna Cesarone,<br>Paola Angela Cichero,<br>Enrico Torre,<br>Francesca Fabbri,<br>Francesca Annunziata,<br>Giovanni Careddu,<br>Laura Veronica<br>Camerieri, Miryam<br>Talco, Eleonora Monti,<br>Maurizio Patrone,<br>Roberta Guido, Valeria<br>Ghigliotti, Alberto<br>Rebora | ASL 3 Genovese<br>Ambulatorio Voltri -<br>Pegli      | SSD Diabetologia<br>Endocrinologia<br>Malattie Metaboliche  | Genova (GE)   |
| LIGURIA | Eleonora Ambrosetti,<br>Micaela Battistini,<br>Francesca Cecoli,<br>Arianna Cesarone,<br>Paola Angela Cichero,<br>Enrico Torre,<br>Francesca Fabbri,<br>Francesca Annunziata,<br>Giovanni Careddu,<br>Laura Veronica<br>Camerieri, Miryam<br>Talco, Eleonora Monti,<br>Maurizio Patrone,<br>Roberta Guido, Valeria<br>Ghigliotti, Alberto<br>Rebora | ASL 3 Genovese<br>Palazzo della salute di<br>Fiumara | SSD Diabetologia-End<br>ocrinologia-Malattie<br>Metaboliche | Genova (GE)   |
| LIGURIA | Eleonora Ambrosetti,<br>Micaela Battistini,                                                                                                                                                                                                                                                                                                         | ASL 3 Genovese Ex<br>Ospedale Nervi                  | SSD Diabetologia-End<br>ocrinologia-Malattie                | Genova (GE)   |

| REGIONE | AUTORI                                                                                                                                                                                                                                                                                                                                              | OSPEDALE                                              | REPARTO                                                      | CITTA'      |
|---------|-----------------------------------------------------------------------------------------------------------------------------------------------------------------------------------------------------------------------------------------------------------------------------------------------------------------------------------------------------|-------------------------------------------------------|--------------------------------------------------------------|-------------|
|         | Francesca Cecoli,<br>Arianna Cesarone,<br>Paola Angela Cichero,<br>Enrico Torre,<br>Francesca Fabbri,<br>Francesca Annunziata,<br>Giovanni Careddu,<br>Laura Veronica<br>Camerieri, Miryam<br>Talco, Eleonora Monti,<br>Maurizio Patrone,<br>Roberta Guido, Valeria<br>Ghigliotti, Alberto<br>Rebora                                                |                                                       | Metaboliche                                                  |             |
| LIGURIA | Eleonora Ambrosetti,<br>Micaela Battistini,<br>Francesca Cecoli,<br>Arianna Cesarone,<br>Paola Angela Cichero,<br>Enrico Torre,<br>Francesca Fabbri,<br>Francesca Annunziata,<br>Giovanni Careddu,<br>Laura Veronica<br>Camerieri, Miryam<br>Talco, Eleonora Monti,<br>Maurizio Patrone,<br>Roberta Guido, Valeria<br>Ghigliotti, Alberto<br>Rebora | ASL 3 Genovese<br>Poliambulatorio Largo<br>12 Ottobre | SSD Daibetologia<br>Endocrinologia<br>Malattie Metaboliche   | Genova (GE) |
| LIGURIA | Eleonora Ambrosetti,<br>Micaela Battistini,<br>Francesca Cecoli,<br>Arianna Cesarone,<br>Paola Angela Cichero,<br>Enrico Torre,<br>Francesca Fabbri,<br>Francesca Annunziata,<br>Giovanni Careddu,<br>Laura Veronica<br>Camerieri, Miryam<br>Talco, Eleonora Monti,<br>Maurizio Patrone,<br>Roberta Guido, Valeria<br>Ghigliotti, Alberto<br>Rebora | ASL 3 Genovese Ex<br>Ospedale Sant'Antonio            | SSD diabetologia<br>Endocrinologia e<br>Malattie Metaboliche | Recco (GE)  |
| LIGURIA | Luca Lione, Mario<br>Monachesi, Amelia<br>Casalini, Simona<br>Oddera                                                                                                                                                                                                                                                                                | ASL 2 Savonese                                        | Ambulatorio di<br>Diabetologia<br>Territoriale               | Savona (SV) |

| REGIONE   | AUTORI                                                                                                                                                                   | OSPEDALE                                               | REPARTO                                                                                                                              | CITTA'                 |
|-----------|--------------------------------------------------------------------------------------------------------------------------------------------------------------------------|--------------------------------------------------------|--------------------------------------------------------------------------------------------------------------------------------------|------------------------|
| LIGURIA   | Luca Lione, Gigi Bocchio, Edmondo Bosco, Giancarlo Markic, Mario Monachesi                                                                                               | UCP Savona Ponente                                     | Ambulatorio di Diabetologia                                                                                                          | Savona (SV)            |
| LOMBARDIA | Stefano Fazion, Marialuisa Spina, Anna Melegari, Maria Elena Cerutti                                                                                                     | ASST-Mantova, Ambulatorio di Asola                     | SSD di Diabetologia e Malattie Metaboliche                                                                                           | Asola (MN)             |
| LOMBARDIA | Stefano Fazion, Alessandra Malaspina, Monica Rizzardi, Loredana Beschi, Virna Pasi, Anna Agosta                                                                          | ASST-Mantova, Ambulatorio di Bozzolo                   | SSD di Diabetologia e Malattie Metaboliche                                                                                           | Bozzolo (MN)           |
| LOMBARDIA | Elena Cimino, Barbara Agosti, Sara Madaschi, Cristina Mascadri, Giulia Massari, Bernadetta Pasquino, Eugenia Resmini, Emanuela Zarra, Angela Girelli                     | ASST -Spedali Civili di Brescia                        | UOC Medicina Generale ad indirizzo Diabetologico                                                                                     | Brescia (BS)           |
| LOMBARDIA | Ida Mangone, Veronica Vilei, Silvia Galliani                                                                                                                             | ASST della Brianza                                     | SSD di Malattie Endocrine, del Ricambio e della Nutrizione                                                                           | Carate (MB)            |
| LOMBARDIA | Valeria Guazzoni, Gloria Groppelli, Andrea Carbone, Martina Molteni, Linda Minelli, Sara Lodigiani                                                                       | Presidio Ospedaliero di Casalpusterlengo, ASST di Lodi | Ambulatorio di diabetologia, Presidio Ospedaliero di Casalpusterlengo, afferente all'UOS Diabetologia ed endocrinologia ASST di Lodi | Casalpusterlengo (LO)  |
| LOMBARDIA | Stefano Fazion, Maria Luisa Spina, Anna Melegari, Maria Elena Cerutti                                                                                                    | ASST-Mantova, Ambulatorio di Castel Goffredo           | SSD di Diabetologia e Malattie Metaboliche                                                                                           | Castel Goffredo (MN)   |
| LOMBARDIA | Davide Attilio Ghelfi, Giuseppina De Felice, Giovanna Squicciarro, Andrea Magistro, Monica Castellan, Maria Iagulli, Rosaria Suriano, Laura Pessina, Sara Fabbri, Chiara | Ospedale E. Bassini ASST Nord Milano                   | SS di Diabetologia e Malattie Metaboliche                                                                                            | Cinisello Balsamo (MI) |

| REGIONE   | AUTORI                                                                                                                                                                                        | OSPEDALE                                             | REPARTO                                                                                                                                 | CITTA'               |
|-----------|-----------------------------------------------------------------------------------------------------------------------------------------------------------------------------------------------|------------------------------------------------------|-----------------------------------------------------------------------------------------------------------------------------------------|----------------------|
|           | Lessa, Sabrina<br>Chirone, Alberto<br>Rocca                                                                                                                                                   |                                                      |                                                                                                                                         |                      |
| LOMBARDIA | Valeria Guazzoni,<br>Gloria Groppelli ,<br>Andrea Carbone ,<br>Martina Molteni ,<br>Linda Minelli , Sara<br>Lodigiani                                                                         | ASST di Lodi ,<br>Presidio Ospedaliero di<br>Codogno | Ambulatori di<br>Diabetologia , Presidio<br>ospedaliero di<br>Codogno, UOS di<br>Diabetologia ed<br>endocrinologia<br>dell'ASST di Lodi | Codogno (LO)         |
| LOMBARDIA | Cinzia Massafra,<br>Maddalena Torresan,<br>Grazia Ferro                                                                                                                                       | ASST Nord Milano                                     | Presidio dei<br>Poliambulatori -<br>Ambulatorio di<br>Cologno Monzese                                                                   | Cologno Monzese (MI) |
| LOMBARDIA | Giuseppe Carrano,<br>Chiara Mauri, Anna<br>Bogani, Francesca<br>Pesenti, Annalisa<br>Creanza, Mariagrazia<br>Tettamanzi, Rachele<br>Motta, Beatrice Cogo,<br>Pozzoli Raffaella, Elli<br>Paolo | ASST Lariana                                         | Azienda Ospedaliera<br>Sant'Anna -<br>Diabetologia                                                                                      | Como (CO)            |
| LOMBARDIA | Patrizia Ruggeri,<br>Sergio Di Lembo, Rosa<br>Moretta, Romano<br>Persico, Cristiana<br>Rossi, Amalia Degli<br>Innocenti, Alida<br>Campagnoni                                                  | ASST Presidio<br>Ospedaliero di<br>Cremona           | Centro Diabetologico                                                                                                                    | Cremona (CR)         |
| LOMBARDIA | Paolo Marengo,<br>Rosana Gaiofatto,<br>Maria Albanese,<br>Augusto Lovagnini<br>Scher                                                                                                          | ASST Nord Milano                                     | Presidio dei<br>Poliambulatori -<br>Ambulatorio di Cusano<br>Milanino                                                                   | Cusano Milanino (MI) |
| LOMBARDIA | Ida Mangone, Annalisa<br>Giancaterini, Emanuele<br>Spreafico, Gabriella<br>Rizzi, Elena Lucia<br>Colombo, Cinzia<br>Galimberti                                                                | ASST della Brianza                                   | SSD di Malattie<br>Endocrine, del<br>Ricambio e della<br>Nutrizione                                                                     | Desio (MB)           |
| LOMBARDIA | Giuseppina Zaltieri,<br>Donata Richini ,<br>Roberto Strazzeri                                                                                                                                 | ASST Valcamonica                                     | UOSS Diabetologia e<br>Malattie del<br>Metabolismo                                                                                      | Esine (BS)           |
| LOMBARDIA | Ida Mangone,<br>Veronica Vilei, Silvia<br>Galliani                                                                                                                                            | ASST della Brianza                                   | SSD di Malattie<br>Endocrine, del<br>Ricambio e della<br>Nutrizione                                                                     | Giussano (MB)        |



| REGIONE   | AUTORI                                                                                                                                                                                                                                                                                                                                      | OSPEDALE                                                                                              | REPARTO                                                                        | CITTA'                  |
|-----------|---------------------------------------------------------------------------------------------------------------------------------------------------------------------------------------------------------------------------------------------------------------------------------------------------------------------------------------------|-------------------------------------------------------------------------------------------------------|--------------------------------------------------------------------------------|-------------------------|
| LOMBARDIA | Valeria Guazzoni,<br>Gloria Groppelli,<br>Andrea Carbone ,<br>Martina Molteni, Linda<br>Minelli, Sara<br>Lodigiani, Cristina<br>Assandri, Simona<br>Devecchi , Emilia<br>Oleari, Silvia<br>Breviglieri , Flavia<br>Sormani, Rosalba<br>Muleddu                                                                                              | ASST di Lodi,<br>Ospedale Maggiore di<br>Lodi                                                         | UOS Diabetologia e<br>Endocrinologia, ASST<br>di Lodi                          | Lodi (LO)               |
| LOMBARDIA | Stefano Fazion,<br>Francesca Saggiani,<br>Malaspina Alessandra,<br>Roberta Nuvolari,<br>Maura Bosi, Alessia<br>Sanguanini, Simonetta<br>Chiarucci, Raffaella<br>Antoniazzi, Paola<br>Cristanini, Elena<br>Pierobon, Laura<br>Paltrinieri, Samanta<br>Aldrovandi, Roberta<br>Casella, Simonetta<br>Moscatelli, Rita Nardi,<br>Cristina Pavan | ASST-Mantova,<br>Ospedale Carlo Poma                                                                  | SSD di Diabetologia e<br>Malattie Metaboliche                                  | Mantova (MN)            |
| LOMBARDIA | Luigi Sciangula,<br>Alessandra Ciucci,<br>Baldassare Grassa,<br>Giacomo Sturniolo,<br>Emanuela Simona<br>Olivo, Maria Grazia<br>Magni, Adele Tono,<br>Silvana Pastori,<br>Barbara Rovelli,<br>Eleonora Gasparotto                                                                                                                           | Presidio<br>Polispecialistico di<br>Mariano Comense -<br>ASST Lariana                                 | Struttura Semplice Inte<br>rDipartimentaleDiabet<br>ologia e<br>Endocrinologia | Mariano Comense<br>(CO) |
| LOMBARDIA | Paolo Fiorina, Maria<br>Elena Lunati, Luciana<br>Maria Vallone , Laura<br>Plebani, Camilla<br>Tinari, Edoardo<br>Baggio                                                                                                                                                                                                                     | Azienda Socio<br>Sanitaria<br>Fatebenefratelli -<br>Sacco/Ospedale<br>Fatebenefratelli e<br>Oftalmico | SSD Malattie<br>Metaboliche -<br>Diabetologia                                  | Milano (MI)             |
| LOMBARDIA | Paolo Fiorina, Paola<br>Silvia Anna Morpurgo,<br>Alessandra Gandolfi,<br>Andrea Mario Bolla                                                                                                                                                                                                                                                 | Presidio Ospedaliero<br>Macedonio Melloni -<br>ASST Fatebenefratelli<br>Sacco                         | Ambulatorio di<br>Endocrinologia e<br>Diabetologia                             | MILANO (MI)             |
| LOMBARDIA | Paolo Fiorina, Ida<br>Pastore, Antonio Rossi<br>, Laura Montefusco,                                                                                                                                                                                                                                                                         | ASST Fatebenefratelli<br>Sacco - Centro Ricerca<br>Invernizzi, Padiglione                             | Malattie Endocrine e<br>Diabetologia                                           | Milano (MI)             |

| REGIONE   | AUTORI                                                                                                                                                                                                                                                                                                                          | OSPEDALE                                                           | REPARTO                                                                               | CITTA'               |
|-----------|---------------------------------------------------------------------------------------------------------------------------------------------------------------------------------------------------------------------------------------------------------------------------------------------------------------------------------|--------------------------------------------------------------------|---------------------------------------------------------------------------------------|----------------------|
|           | Enrica Chebat, Milena Muratori                                                                                                                                                                                                                                                                                                  | 62                                                                 |                                                                                       |                      |
| LOMBARDIA | Rosa Terranova                                                                                                                                                                                                                                                                                                                  | ASST Nord Milano                                                   | Presidio dei Poliambulatori - Ambulatorio di via Livigno                              | Milano (MI)          |
| LOMBARDIA | Gabriella Piscitelli, Ivana Defronzo                                                                                                                                                                                                                                                                                            | ASST Nord Milano                                                   | Presidio dei Poliambulatori - Ambulatorio di Piazzale Accursio                        | Milano (MI)          |
| LOMBARDIA | Raffaella Mattioni, Simona Citterio, Rosita Stanga, Nadia Devincenzo                                                                                                                                                                                                                                                            | ASST Nord Milano                                                   | Presidio dei Poliambulatori - Ambulatorio di Via Farini                               | Milano (MI)          |
| LOMBARDIA | Mariluce Barrasso                                                                                                                                                                                                                                                                                                               | ASST Nord Milano                                                   | Presidio dei Poliambulatori - POLIAMBULATORI O VIA MASANIELLO                         | Milano (MI)          |
| LOMBARDIA | Marina Scavini, Giuseppe Ancona, Loredana Bonisolli, Amelia Caretto, Alberto Davalli, Gabriella Galimberti, Andrea Laurenzi, Sabina Martinenghi, Chiara Molinari, Matteo Rocco Pastore, Erika Pedone, Giovanna Petrella, Emanuela Setola, Emanuele Bosi, Anna Zanardini, Walter Pepe, Sonia Letizia, Anna Vigna, Chiara Sartori | Istituto Scientifico-Universitario H. San Raffaele                 | Diabetologia - UO Medicina Generale ad indirizzo Diabetologico o Endocrino Metabolico | Milano (MI)          |
| LOMBARDIA | Stefano Benedini, Regina Dagani, Marco Laneri, Saibene Alessandro, Adolfo Carlo Bianchi                                                                                                                                                                                                                                         | Clinica San Carlo - Casa di cura privata Poli specialistica S.p.a. | Sevizio di Diabetologia                                                               | Paderno Dugnano (MI) |
| LOMBARDIA |                                                                                                                                                                                                                                                                                                                                 | ASST Bergamo Est - Ospedale M.O. Locatelli                         | Servizio di Diabetologia                                                              | Piaro (BG)           |
| LOMBARDIA | Marica Sormani, Antonio Tempesta, Fabrizia Didoni,                                                                                                                                                                                                                                                                              | Presidio Ospedaliero di Rho - ASST Rhodense                        | Ambulatorio di diabetologia                                                           | Rho (MI)             |

| REGIONE   | AUTORI                                                                                                                                                               | OSPEDALE                                                                       | REPARTO                                                                 | CITTA'                  |
|-----------|----------------------------------------------------------------------------------------------------------------------------------------------------------------------|--------------------------------------------------------------------------------|-------------------------------------------------------------------------|-------------------------|
|           | Michela Gianni, Anna Schiatti, Antonio Tempesta, Valeria Valdes                                                                                                      |                                                                                |                                                                         |                         |
| LOMBARDIA | Ida Mangone, Veronica Vilei                                                                                                                                          | ASST della Brianza                                                             | SSD di Malattie Endocrine, del Ricambio e della Nutrizione              | Seregno (MB)            |
| LOMBARDIA | Cesare Celeste Berra                                                                                                                                                 | IRCCS Multimedica                                                              | UO di Diabetologia e Malattie Metaboliche                               | Sesto San Giovanni (MI) |
| LOMBARDIA | Giancarla Meregalli, Denise Berzi, Danila Camozzi, Franco Forloni, Valentina De Mori, Lucia Valentini                                                                | ASST Bergamo Ovest                                                             | UOC Malattie Endocrine - Centro di riferimento regionale per il Diabete | Treviglio (BG)          |
| LOMBARDIA | Stefano Fazion, Giovanni Rignanese, Marina Scaravelli, Gigliola Botta, Federica Chiari                                                                               | ASST-Mantova, Ambulatorio di Viadana                                           | SSD di Diabetologia e Malattie Metaboliche                              | Viadana (MN)            |
| LOMBARDIA | Marta Di Stefano, Caterina Nucera, Maria Lauretta Anelli, Maria Grazia Tinelli, Ida Mangone                                                                          | ASST della Brianza                                                             | SSD di Malattie Endocrine, del Ricambio e della Nutrizione              | Vimercate (MB)          |
| MARCHE    | Valentino Cherubini, Valentina Tiberi, Antonio Iannilli, Monica Marino, Giada Boccolini, Antonia Capogna                                                             | Azienda Ospedaliero-Universitaria Ospedali Riuniti Ancona - Presidio G. Salesi | S.O.D. Diabetologia Pediatrica                                          | Ancona (AN)             |
| MARCHE    | Francesca Silveti , Lara Giovannini, Alessio Pieroni, Michele Perrone , Lucia Stella, Carlotta Peroni, Giorgia Squartini, Massimiliano Petrelli                      | Ospedali Riuniti delle Marche                                                  | Clinica di Endocrinologia e Malattie del Metabolismo                    | Ancona (AN)             |
| MARCHE    | Luigi Lanari, Federica Turchi, Maria Paola Luconi, Natascia Giorgini, Sonia Rosati, Magda Zenobi, Marco Federici, Beatrice Ciappini, Manuel Lagonigro, Elena Tortato | INRCA - IRCCS                                                                  | UOC Malattie Metaboliche e Diabetologia                                 | Ancona (AN)             |

| REGIONE | AUTORI                                                                                                                                                                                                     | OSPEDALE                                                                       | REPARTO                                          | CITTA'                    |
|---------|------------------------------------------------------------------------------------------------------------------------------------------------------------------------------------------------------------|--------------------------------------------------------------------------------|--------------------------------------------------|---------------------------|
| MARCHE  | Graziano Simonella,<br>Marianna Galetta,<br>Milena Santangelo,<br>Federica D'Angelo,<br>Rosa Anna Rabini                                                                                                   | ASUR Marche AV5 -<br>Ospedale Mazzoni                                          | UOC Malattie<br>Metaboliche e<br>Diabetologia    | Ascoli Piceno (AP)        |
| MARCHE  | Natalia Busciantella<br>Ricci, Michelina<br>Radatti                                                                                                                                                        | Area Vasta 3 Zona<br>territoriale 10 Ospedale<br>Civile Camerino               | Diabetologia e Malattie<br>Endocrino-metaboliche | Camerino (MC)             |
| MARCHE  | Cristian Quattrini,<br>Clara Alessiani,<br>Ornella Quarchioni                                                                                                                                              | ASUR Area Vasta 3 -<br>Distretto di Civitanova<br>Marche                       | UOSD Diabetologia                                | Civitanova Marche<br>(MC) |
| MARCHE  | Vanessa Ronconi,<br>Giorgio Montecchiani                                                                                                                                                                   | AST Ancona-Ospedale<br>E. Profili                                              | UOSD Malattie<br>Metaboliche e<br>Diabetologia   | Fabriano (AN)             |
| MARCHE  | Gabriella Garrapa,<br>Anna Cani, Erica<br>Landini, Giulio<br>Lucarelli, Manuela<br>Montoni, Isabella<br>Occhialini, Lara<br>Riccialdelli, Carla<br>Spendolini                                              | Ospedale Santa Croce-<br>Azienda Sanitaria<br>Territoriale di Pesaro<br>Urbino | UOSD Endocrinologia<br>e Diabetologia            | Fano (PU)                 |
| MARCHE  | Paola Pantanetti,<br>Sandra Di Marco ,<br>Grazia Michetti,<br>Giovanni Cangelosi,<br>Cristina De Carolis,<br>Marco Di Giacinti ,<br>Orietta Pazzi, Gianluca<br>Cerasoli, Susanna<br>Talevi, Sara Alberti   | PO A. Murri - Asur<br>Marche Area Vasta 4                                      | UOSD Diabetologia                                | Fermo (FM)                |
| MARCHE  | Paola Canibus, Franco<br>Gregorio, Francesca<br>Paggi                                                                                                                                                      | Asur Marche - Area<br>Vasta 2 - Jesi                                           | UOSD malattie<br>metaboliche e<br>diabetologia   | Jesi (AN)                 |
| MARCHE  | Gabriele Brandoni,<br>Francesca Carletti,<br>Francesca Giampaoli,<br>Manuela Ferroni, Anna<br>Maria Frascati                                                                                               | Ospedale Santa Casa -<br>ASUR Marche Area<br>Vasta 2                           | Diabetologia                                     | Loreto (AN)               |
| MARCHE  | Gabriele Brandoni,<br>Brabara Polenta,<br>Marilena Giovagnetti,<br>Francesca Borroni ,<br>Andrea Benigni, Ilaria<br>Peretti , Samuela<br>Lardelli, Francesca<br>Carletti, Vincenzo<br>Carletti, Anna Maria | AV3 Presidio<br>Ospedaliero Macerata                                           | Diabetologia                                     | Macerata (MC)             |

| REGIONE  | AUTORI                                                                                                                                                                                                                   | OSPEDALE                                                                       | REPARTO                                                       | CITTA'                           |
|----------|--------------------------------------------------------------------------------------------------------------------------------------------------------------------------------------------------------------------------|--------------------------------------------------------------------------------|---------------------------------------------------------------|----------------------------------|
|          | Tesei, Jihane Lagtaa,<br>Milena Corvini                                                                                                                                                                                  |                                                                                |                                                               |                                  |
| MARCHE   | Luigi Maggiulli, Giulio<br>Lucarelli, Alessandro<br>Micillo, Anna Cani,<br>Francesca Felicita,<br>Giuseppina Fiori,<br>Milena Giusti, Fabiola<br>Lizzadro, Milena Paris,<br>Antonio Russo,<br>Antonella Sanchini         | Ospedale San<br>Salvatore - Azienda<br>Sanitaria Territoriale<br>Pesaro Urbino | UOSD Endocrinologia<br>e Diabetologia                         | Pesaro (PU)                      |
| MARCHE   | Gabriele Brandoni,<br>Andrea Benigni, Ilaria<br>Peretti , Maria Laura<br>Scarpantoni, Rina<br>Mozzoni, Francesca<br>Carletti, Carla<br>Orlandini, Tonia<br>Lattanzi                                                      | Ospedale Santa Lucia -<br>ASUR Marche Area<br>vasta 3                          | Diabetologia                                                  | Recanati (MC)                    |
| MARCHE   | Marianna Galetta,<br>Graziano Simonella ,<br>Milena Santangelo,<br>Federica D'Angelo,<br>Rosa Anna Rabini                                                                                                                | ASUR Marche AV5 -<br>Ospedale Madonna Del<br>Soccorso                          | UOC Malattie<br>Metaboliche e<br>Diabetologia                 | San Benedetto del<br>Tronto (AP) |
| MARCHE   | Silvana Manfrini,<br>Silvia Rilli, Gessica<br>Tinti, Daniela Pesce,<br>Sebastiano Attardo                                                                                                                                | Asur Marche - Area<br>Vasta 2 - Senigallia                                     | U.O. Diabetologia                                             | Senigallia (AN)                  |
| MARCHE   | Maurizio Sudano,<br>Claudio Molaioni,<br>Carlucci Maria<br>Assunta, Laura<br>Biagiotti                                                                                                                                   | Ospedale Urbino Asur<br>Marche 1                                               | SIT Diabetologia<br>Endocrinologia                            | Urbino (PU)                      |
| MOLISE   | Mariarosaria<br>Cristofaro, Simonetta<br>Di Vincenzo                                                                                                                                                                     | A.S.R.e.M. Presidio<br>Ospedaliero<br>'A.Cardarelli'                           | SC Endocrinologia -<br>Diabetologia - Malattie<br>Metaboliche | Campobasso (CB)                  |
| PIEMONTE | Emanuele Fraticelli,<br>Elisabetta Benedusi,<br>Andi Masha, Maria<br>Elena Valera Mora,<br>Teresa D'Ambrosio,<br>Loredana Silvosi,<br>Cristiana Olivero,<br>Margherita Fissore,<br>Manuela Morello,<br>Giovanni La Motta | ASL CN02 Alba Bra                                                              | SSD Diabetologia e<br>Malattie Metaboliche<br>sede di ALba    | Alba (CN)                        |
| PIEMONTE | Enrico Gabellieri,<br>Paola Loporati, Alberto                                                                                                                                                                            | AO SS Antonio e<br>Biagio e Cesare Arrigo                                      | SC Endocrinologia e<br>Malattie Metaboliche 2                 | Alessandria (AL)                 |

| REGIONE  | AUTORI                                                                                                                                                                                                                    | OSPEDALE                             | REPARTO                                                       | CITTA'           |
|----------|---------------------------------------------------------------------------------------------------------------------------------------------------------------------------------------------------------------------------|--------------------------------------|---------------------------------------------------------------|------------------|
|          | Ragni, Emilia<br>Biamonte, Giulia<br>Bendotti, Marco Gallo                                                                                                                                                                |                                      | piano                                                         |                  |
| PIEMONTE | Chiara Bima, Piero<br>Radaelli , Irene<br>Samperi, Mara<br>Steffanini, Isabella<br>Bagatin, Monica<br>Bertalli , Laura Cerini ,<br>Molinari Raffaella ,<br>Barbara Patrucco,<br>Giovanna Ziero, Maria<br>Chantal Ponziani | Ospedale SS Trinita' -<br>ASI Novara | SSV Dipartimento di<br>Malattie Metaboliche e<br>Diabetologia | Borgomanero (NO) |
| PIEMONTE | Emanuele Fraticelli,<br>Elisabetta Benedusi,<br>Andi Masha, Maria<br>Elena Valera Mora,<br>Margherita Fissore,<br>Teresa D'Ambrosio,<br>Cristiana Olivero,<br>Giovanni La Motta                                           | ASL CN2 Alba Bra                     | SSD Diabetologia e<br>Malattie Metaboliche-<br>Sede Di Bra    | Bra (CN)         |
| PIEMONTE | Emanuele Fraticelli,<br>Elisabetta Benedusi,<br>Andi Masha, Maria<br>Elena Valera Mora,<br>Teresa D'Ambrosio,<br>Loredana Silvosi,<br>Cristiana Olivero,<br>Margherita Fissore,<br>Manuela Morello,<br>Giovanni La Motta  | ASL CN2 ALBA BRA                     | SSD Diabetologia e<br>Malattie Metaboliche<br>sede di Canale  | Canale (CN)      |
| PIEMONTE | Carlo Bruno Giorda,<br>Giuliana Micali,<br>Sandra Vendemiati,<br>Liliana Audero,<br>Antonela Crina<br>Bursuc, Mirella<br>Fornero, Loredana<br>Cuccia, Francesco<br>Romeo, Marella<br>Doglio                               | Ospedale San Lorenzo<br>- ASL TO5    | S.C. Diabetologia<br>Territoriale                             | Carmagnola (TO)  |
| PIEMONTE | Carlo Bruno Giorda ,<br>Francesco Romeo,<br>Origlia Carla, Elena<br>Capello, Valentina<br>D'Angelo, Tecla<br>Marchese, Dolores<br>Marzano, Loredana<br>Cuccia, Anna Piovano,<br>Cassandra Norma                           | Ospedale Maggiore di<br>Chieri       | S.C. Diabetologia<br>Territoriale                             | Chieri (TO)      |

| REGIONE  | AUTORI                                                                                                                                                                                            | OSPEDALE                                                                 | REPARTO                                               | CITTA'           |
|----------|---------------------------------------------------------------------------------------------------------------------------------------------------------------------------------------------------|--------------------------------------------------------------------------|-------------------------------------------------------|------------------|
|          | Roma, Mariangela Incani, Simona Chiara, Patrizia Giai Via, Elisa Nada, Marisol Ibeth Cherigo , Barbara Tartaglino, Marella Doglio                                                                 |                                                                          |                                                       |                  |
| PIEMONTE | Riccardo Fornengo, Lidia Di Vito, Valentina Gatto, Stefano Allasia, Elisa Marinazzo, Maria Divina Pascuzzo                                                                                        | ASLTO4 Distretto di Chivasso e San Mauro e Distretto di Settimo Torinese | S.S.D. di Diabetologia                                | Chivasso (TO)    |
| PIEMONTE | Francesco Caraffa, Daniela Gallo, Chiara Giulia Croce, Riccardo Fornengo                                                                                                                          | ASLTO4 Distretto di Ciriè                                                | S.S.D. di Diabetologia                                | Ciriè (TO)       |
| PIEMONTE | Francesco Tassone                                                                                                                                                                                 | AOS S.Croce e Carle Di Cuneo                                             | Endocrinologia e Diabetologia                         | Cuneo (CN)       |
| PIEMONTE | Giuseppe Placentino , Maura Rinaldi, Monica Adriana Resnik Scalella, Erika Mangione, Chiara Volpone, Danila Guida                                                                                 | Ospedale S. Biagio                                                       | SOC di Diabetologia e Malattie Metaboliche            | Domodossola (VB) |
| PIEMONTE | Stefano Allasia, Elisa Marinazzo, Maria Divina Pascuzzo, Maria Pia Bavoso, Riccardo Fornengo, Chiara Giulia Croce, Piero Michele Modina                                                           | ASLTO4 Distretto di Ivrea e Distretto di Cuorgnè                         | S.S.D. di Diabetologia                                | Ivrea (TO)       |
| PIEMONTE | Carlo Bruno Giorda, Roberta Manti, Giovanna Saraceno, Massimo Rainero, Cristina Linzalata, Cristina Laiolo, Rosa Mortello, Ornella Boscolo, Marella Doglio , Paola Chiaberti, Anna Paola Quaranta | Distretto Sanitario ASL TO5 sede di Moncalieri                           | S.C. Diabetologia Territoriale                        | Moncalieri (TO)  |
| PIEMONTE | Carlo Bruno Giorda, Marella Doglio, Taisir Mahagna, Loredana Brocato, Giovanna Saraceno, Barbara Sieve, Dolores                                                                                   | Ospedale Maggiore - ASL TO5                                              | Diabetologia e Malattie Metaboliche sede di Nichelino | Nichelino (TO)   |

| REGIONE  | AUTORI                                                                                                                                                                                                                             | OSPEDALE                                           | REPARTO                                     | CITTA'                |
|----------|------------------------------------------------------------------------------------------------------------------------------------------------------------------------------------------------------------------------------------|----------------------------------------------------|---------------------------------------------|-----------------------|
|          | Marzano, Concetta<br>Franchina, Filomena<br>D'Angelo, Sandra<br>Fasano, Simonetta<br>Broggio                                                                                                                                       |                                                    |                                             |                       |
| PIEMONTE | Mauro Stroppiana,<br>Silvia Maria Abate,<br>Maria Elena Voglino,<br>Marica Pinna, Rosetta<br>Popolizio, Mirella<br>Scarampi, Susanna<br>Baldi, Marina Fresia,<br>Lorella Tibaldi, Lorena<br>Molino                                 | ASL AT - Asti                                      | Medicina<br>Polifunzionale c/o<br>Ospedale  | Nizza Monferrato (AT) |
| PIEMONTE | Paolo Marzullo, Flavia<br>Prodam, Marina<br>Caputo, Gianluca<br>Aimaretti, Tommaso<br>Daffara, Valentina<br>Bullara, Marco<br>Zavattaro, Maria<br>Grazia Mauri, Maria<br>Teresa Samà                                               | A.O.U. Maggiore della<br>Carita' Novara            | SCDU Endocrinologia                         | Novara (NO)           |
| PIEMONTE | Giuseppe Placentino,<br>Maura Rinaldi, Monica<br>Adriana Resnik<br>Scalella, Erika<br>Mangione, Chiara<br>Volpone                                                                                                                  | ASL Verbania - Cusio<br>- Ossola (VCO)<br>Piemonte | SSD Diabetologia e<br>Malattie Metaboliche  | Omegna (VB)           |
| PIEMONTE | Enrico Pergolizzi,<br>Anna Rosa Bogazzi,<br>Giovanna Bendinelli                                                                                                                                                                    | Ospedale di Pianezza<br>ASL TO3                    | SSD Malattie<br>Endocrine e<br>Diabetologia | Pianezza (TO)         |
| PIEMONTE | Enrico Pergolizzi,<br>Paola Gennari, Daniela<br>Gaia, Giuliana Micali,<br>Patrizia Marino,<br>Federica De Cicco,<br>Katia Bonomo,<br>Elisabetta Rossetto,<br>Tiziana Stefani,<br>Antonio Modarelli,<br>Laura Bellino, Anna<br>Clot | Ospedale Civile di<br>Pinerolo ASL TO3             | SSD Malattie<br>Endocrine e<br>Diabetologia | Pinerolo (TO)         |
| PIEMONTE | Enrico Pergolizzi,<br>Anna Rosa Bogazzi,<br>Giovanna Bendinelli,<br>Domenica Giuffrida,<br>Marta Aventaggiato,<br>Elisa Me                                                                                                         | Ospedale di Rivoli<br>ASL TO3                      | SSD Malattie<br>Endocrine e<br>Diabetologia | Rivoli (TO)           |



| REGIONE  | AUTORI                                                                                                                                                                                                                                                                                                                                                                                                                                                                                                                                                                                                                                                                                        | OSPEDALE                                                    | REPARTO                                     | CITTA'      |
|----------|-----------------------------------------------------------------------------------------------------------------------------------------------------------------------------------------------------------------------------------------------------------------------------------------------------------------------------------------------------------------------------------------------------------------------------------------------------------------------------------------------------------------------------------------------------------------------------------------------------------------------------------------------------------------------------------------------|-------------------------------------------------------------|---------------------------------------------|-------------|
| PIEMONTE | Enrico Pergolizzi,<br>Maria Ausilia<br>Caccavale,<br>Mariantonietta Secchi                                                                                                                                                                                                                                                                                                                                                                                                                                                                                                                                                                                                                    | Ospedale Civile di<br>Susa ASL TO3                          | SSD Malattie<br>Endocrine e<br>Diabetologia | Susa (TO)   |
| PIEMONTE | Salvatore Oleandri,<br>Elena Gramaglia,<br>Enrico Mazza, Maria<br>Antonietta Altea,<br>Marcella Libera Balbo,<br>Maria Pia Norma<br>Bavoso, Alberto<br>Blatto, Loredana<br>Brocato, Francesco<br>Brogna, Enrica<br>Ciccarelli, Alessandra<br>Clerico, Ginevra<br>Corneli, Claudia De<br>Natale , Fabiana Di<br>Noi, Francesca Garino,<br>Carlotta Gauna,<br>Cristina Gottero, Piero<br>Griseri, Michele<br>Iaccarino, Alessandra<br>Rita Mainolfi, Lisa<br>Marafetti , Cristina<br>Matteoda, Enzo<br>Megale, Maria Divina<br>Pascuzzo, Giuliana<br>Petraroli, Valentina<br>Ramella Gigliardi,<br>Claudio Rossi, Silvia<br>Rovere, Daniela<br>Sansone, Claudia<br>Toscano, Felicia<br>Visconti | ASL Citta' di Torino -<br>Ospedale Maria<br>Vittoria        | SC Endocrinologia<br>Malattie Metaboliche   | Torino (TO) |
| PIEMONTE | Maria Antonietta Altea<br>, Marcella Libera<br>Balbo, Maria Pia<br>Norma Bavoso,<br>Alberto Blatto,<br>Loredana Brocato,<br>Francesco Brogna,<br>Enrica Ciccarelli,<br>Alessandra Clerico ,<br>Ginevra Corneli,<br>Claudia De Natale ,<br>Fabiana Di Noi ,<br>Francesca Garino,<br>Carlotta Gauna ,<br>Cristina Gottero, Elena<br>Gramaglia, Piero                                                                                                                                                                                                                                                                                                                                            | ASL Citta' di Torino -<br>Presidio Ospedaliero<br>Oftalmico | SC Endocrinologia e<br>Malattie Metaboliche | Torino (TO) |

| REGIONE  | AUTORI                                                                                                                                                                                                                                                                                                                                                                                                                                                                                                                                                                                                                                                                                        | OSPEDALE                                                   | REPARTO | CITTA'      |
|----------|-----------------------------------------------------------------------------------------------------------------------------------------------------------------------------------------------------------------------------------------------------------------------------------------------------------------------------------------------------------------------------------------------------------------------------------------------------------------------------------------------------------------------------------------------------------------------------------------------------------------------------------------------------------------------------------------------|------------------------------------------------------------|---------|-------------|
|          | Griseri, Michele<br>Iaccarino, Alessandra<br>Rita Mainolfi, Lisa<br>Marafetti, Cristina<br>Matteoda, Enrico<br>Mazza, Enzo Megale,<br>Salvatore Endrio<br>Oleandri, Maria<br>Divina Pascuzzo,<br>Giuliana Petraroli,<br>Valentina Ramella<br>Gigliardi, Claudio<br>Rossi, Silvia Rovere,<br>Daniela Sansone,<br>Maria Angela Seardo,<br>Claudia Toscano,<br>Felicia Visconti                                                                                                                                                                                                                                                                                                                  |                                                            |         |             |
| PIEMONTE | Maria Antonietta<br>Altea, Marcella Libera<br>Balbo, Maria Pia<br>Norma Bavoso,<br>Alberto Blatto,<br>Loredana Brocato,<br>Francesco Brogna,<br>Enrica Ciccarelli,<br>Alessandra Clerico,<br>Ginevra Corneli,<br>Claudia De Natale,<br>Fabiana Di Noi,<br>Francesca Garino,<br>Carlotta Gauna,<br>Cristina Gottero, Elena<br>Gramaglia, Piero<br>Griseri, Alessandra<br>Rita Mainolfi, Lisa<br>Marafetti, Cristina<br>Matteoda, Enrico<br>Mazza, Enzo Megale,<br>Salvatore Oleandri,<br>Maria Divina Pascuzzo,<br>Giuliana Petraroli,<br>Valentina Ramella<br>Gigliardi, Claudio<br>Rossi, Silvia Rovere,<br>Daniela Sansone,<br>Maria Angela Seardo,<br>Claudia Toscano,<br>Felicia Visconti | ASL Citta' di Torino -<br>POLIAMBULATORI<br>O C.so TOSCANA |         | Torino (TO) |
| PIEMONTE | Maria Antonietta<br>Altea, Marcella Libera<br>Balbo, Maria Pia<br>Norma Bavoso,                                                                                                                                                                                                                                                                                                                                                                                                                                                                                                                                                                                                               | ASL Citta' di Torino -<br>LUNGO DORA<br>SAVONA             |         | Torino (TO) |

| REGIONE  | AUTORI                                                                                                                                                                                                                                                                                                                                                                                                                                                                                                                                                                                                                                         | OSPEDALE                                                | REPARTO | CITTA'      |
|----------|------------------------------------------------------------------------------------------------------------------------------------------------------------------------------------------------------------------------------------------------------------------------------------------------------------------------------------------------------------------------------------------------------------------------------------------------------------------------------------------------------------------------------------------------------------------------------------------------------------------------------------------------|---------------------------------------------------------|---------|-------------|
|          | Alberto Blatto,<br>Loredana Brocato,<br>Francesco Brogna,<br>Enrica Ciccarelli,<br>Alessandra Clerico,<br>Ginevra Corneli,<br>Claudia De Natale,<br>Fabiana Di Noi,<br>Francesca Garino,<br>Carlotta Gauna,<br>Cristina Gottero, Elena<br>Gramaglia, Piero<br>Griseri , Michele<br>Iaccarino, Alessandra<br>Rita Mainolfi, Lisa<br>Marafetti, Cristina<br>Matteoda, Enrico<br>Mazza , Enzo Megale,<br>Salvatore Endrio<br>Oleandri, Maria Divina<br>Pascuzzo, Giuliana<br>Petraroli, Valentina<br>Ramella Gigliardi,<br>Claudio Rossi , Silvia<br>Rovere, Daniela<br>Sansone , Maria<br>Angela Seardo,<br>Claudia Toscano,<br>Felicia Visconti |                                                         |         |             |
| PIEMONTE | Maria Antonietta Altea<br>, Marcella Libera<br>Balbo, Maria Pia<br>Norma Baviruso, Alerto<br>Blatto, Loredana<br>Brocato , Fracesco<br>Brogna, Enrica<br>Ciccarelli, Alessandra<br>Clerico, Ginevra<br>Corneli, Claudia De<br>Natale, Fabiana Di<br>Noi, Francesca Garino,<br>Carlotta Gauna ,<br>Cristina Gottero, Elena<br>Gramaglia, Piero<br>Griseri, Michele<br>Iaccarino, Alessandra<br>Rita Mainolfi, Lisa<br>Marafetti, Cristina<br>Matteoda, Enrico<br>Mazza , Enzo Megale,<br>Salvatore Oleandri,<br>Maria Divina                                                                                                                    | ASL Citta' di Torino -<br>POLIAMBULATORI<br>O MONTANARO |         | Torino (TO) |

| REGIONE  | AUTORI                                                                                                                                                                                                                                                                                                                                                                                                                                                                                                                                                                                                                                                                                                                                               | OSPEDALE                                                 | REPARTO | CITTA'      |
|----------|------------------------------------------------------------------------------------------------------------------------------------------------------------------------------------------------------------------------------------------------------------------------------------------------------------------------------------------------------------------------------------------------------------------------------------------------------------------------------------------------------------------------------------------------------------------------------------------------------------------------------------------------------------------------------------------------------------------------------------------------------|----------------------------------------------------------|---------|-------------|
|          | Pascuzzo, Giuliana<br>Petaroli, Valentina<br>Ramella Gigliardi,<br>Claudio Rossi, Silvia<br>Rovere, Daniela<br>Sansone, Maria Angela<br>Seardo, Claudia<br>Toscano, Felicia<br>Visconti                                                                                                                                                                                                                                                                                                                                                                                                                                                                                                                                                              |                                                          |         |             |
| PIEMONTE | Lisa Marafetti, Cristina<br>Matteoda, Enrico<br>Mazza, Enzo Megale,<br>Salvatore Endrio<br>Oleandri, Maria Divina<br>Pascuzzo , Giuliana<br>Petaroli, Valentina<br>Ramella Gigliardi,<br>Claudio Rossi , Silvia<br>Rovere, Daniela<br>Sansone, Maria Angela<br>Seardo, Claudia<br>Toscano, Felicia<br>Visconti, Maria<br>Antonietta Altea,<br>Marcella Libera Balbo,<br>Maria Pia Norma<br>Bavoso, Alberto<br>Blatto, Loredana<br>Brocato, Francesco<br>Brogna, Enrica<br>Ciccarelli, Alessandra<br>Clerico, Ginevra<br>Corneli, Claudia De<br>Natale , Fabiana Di<br>Noi , Francesca<br>Garino, Carlotta<br>Gauna, Cristina<br>Gottero, Elena<br>Gramaglia, Piero<br>Griseri, Michele<br>Iaccarino, Alessandra<br>Rita Mainolfi , Lisa<br>Marafetti | ASL Citta' di Torino -<br>POLIAMBULATORI<br>O PACCHIOTTI |         | Torino (TO) |
| PIEMONTE | Salvatore Oleandri                                                                                                                                                                                                                                                                                                                                                                                                                                                                                                                                                                                                                                                                                                                                   | ASL Citta' di Torino -<br>TORINO GORIZIA                 |         | Torino (TO) |
| PIEMONTE | Maria Antonietta Altea<br>, Marcella Libera<br>Balbo, Maria Pia<br>Norma Bavoso ,<br>Alberto Blatto,<br>Loredana Brocato,                                                                                                                                                                                                                                                                                                                                                                                                                                                                                                                                                                                                                            | ASL Citta' di Torino -<br>TORINO<br>MONGINEVRO           |         | Torino (TO) |

| REGIONE  | AUTORI                                                                                                                                                                                                                                                                                                                                                                                                                                                                                                                                                                                                | OSPEDALE                             | REPARTO                                       | CITTA'             |
|----------|-------------------------------------------------------------------------------------------------------------------------------------------------------------------------------------------------------------------------------------------------------------------------------------------------------------------------------------------------------------------------------------------------------------------------------------------------------------------------------------------------------------------------------------------------------------------------------------------------------|--------------------------------------|-----------------------------------------------|--------------------|
|          | Francesco Brogna,<br>Enrica Ciccarelli,<br>Alessandra Clerico,<br>Ginevra Corneli,<br>Claudia De Natale ,<br>Fabiana Di Noi ,<br>Francesca Garino,<br>Carlotta Gauna,<br>Cristina Gottero, Elena<br>Gramaglia, Piero<br>Griseri, Michele<br>Iaccarino, Alessandra<br>Rita Mainolfi, Lisa<br>Marafetti, Cristina<br>Matteoda , Enrico<br>Mazza, Enzo Megale,<br>Salvatore Endrio<br>Oleandri, Maria Divina<br>Pascuzzo, Giuliana<br>Petraroli, Valentina<br>Ramella Gigliardi,<br>Claudio Rossi, Silvia<br>Rovere, Daniela<br>Sansone, Maria Angela<br>Seardo, Claudia<br>Toscano, Felicia<br>Visconti |                                      |                                               |                    |
| PIEMONTE | Enrico Pergolizzi,<br>Anna Rosa Bogazzi,<br>Giovanna Bendinelli                                                                                                                                                                                                                                                                                                                                                                                                                                                                                                                                       | Ospedale di Venaria<br>Reale ASL TO3 | SSD Malattie<br>Endocrine e<br>Diabetologia   | Venaria Reale (TO) |
| PIEMONTE | Giuseppe Placentino,<br>Maura Rinaldi, Monica<br>Adriana Resnik<br>Scalella, Erika<br>Mangione, Chiara<br>Volpone                                                                                                                                                                                                                                                                                                                                                                                                                                                                                     | Ospedale di Verbania                 | SOC di Diabetologia e<br>Malattie Metaboliche | Verbania (VB)      |
| PIEMONTE | Roberta Paltro, Simona<br>Bandinelli, Luisella<br>Savino, Arianna Busti,<br>Valeria Cambria, Ilaria<br>Leone                                                                                                                                                                                                                                                                                                                                                                                                                                                                                          | ASL VC                               | SS Diabetologia e<br>Malattie Metaboliche     | Vercelli (VC)      |
| PUGLIA   | Saverio Fatone,<br>Alessandra Di<br>Flaviani,<br>Michelantonio Defano                                                                                                                                                                                                                                                                                                                                                                                                                                                                                                                                 | ACISMOM Andria                       | Centro Diabetologico                          | Andria (BT)        |
| PUGLIA   | Stefania Annese,<br>Matteo Paradiso,<br>Chiara Corsano, Olga<br>Lamacchia                                                                                                                                                                                                                                                                                                                                                                                                                                                                                                                             | OORR Riuniti di<br>Foggia            | Endocrinologia                                | Foggia (FG)        |

| REGIONE  | AUTORI                                                                                                                                                                                                            | OSPEDALE                                                      | REPARTO                                                                             | CITTA'                    |
|----------|-------------------------------------------------------------------------------------------------------------------------------------------------------------------------------------------------------------------|---------------------------------------------------------------|-------------------------------------------------------------------------------------|---------------------------|
| PUGLIA   | Fabrizio Diacono                                                                                                                                                                                                  | ASL Lecce - Poliambulatorio Martano                           | Ambulatorio di diabetologia                                                         | Martano (LE)              |
| PUGLIA   | Irene Alemanno, Lattanzio Cristiana                                                                                                                                                                               | ASL Lecce DSS Poggiardo                                       | Endocrinologia                                                                      | Poggiardo (LE)            |
| PUGLIA   | Salvatore De Cosmo, Piscitelli Pamela , Rauseo Anna                                                                                                                                                               | IRCCS Casa Sollievo della Sofferenza                          | Medicina Interna - Endocrinologia                                                   | San Giovanni Rotondo (FG) |
| PUGLIA   | Giuliana Cazzetta, Maria Teresa Branca, Marzia Filesi                                                                                                                                                             | ASL Lecce                                                     | Poliambulatorio Tricase                                                             | Tricase (LE)              |
| PUGLIA   | Giuliana Cazzetta, Claudia Toma                                                                                                                                                                                   | ASL Lecce                                                     | Poliambulatorio Distrettuale Ugento                                                 | Ugento (LE)               |
| SARDEGNA | Giovanna Paola Tolu, Maria Pasqua Piras , Giuseppa Aguglia , Serafina Sini, Carla Verdi, Luisa Porcu                                                                                                              | ASL Sassari , Distretto Sanitario di Alghero, Poliambulatorio | Servizio di Diabetologia e Malattie del Metabolismo, Distretto Sanitario di Alghero | Alghero (SS)              |
| SARDEGNA | Ef시오 Cossu, Rosangela Maria Pilosu, Francesca Spanu, Maria Pina Puddu, Paola Pisanu, Antonietta Casu, Adelina Porru, Maria Vitalia Ortu , Maria Margherita Gessa, Carlotta Macis, Sabina Mereu , Giorgetta Farina | Presidio San Giovanni di Dio                                  | Diabetologia e malattie metaboliche                                                 | Cagliari (CA)             |
| SARDEGNA | Roberto Seguro, Francesca Scano, Valentina Maria Cambuli, Anna Rita Angioni                                                                                                                                       | Ospedale San Michele Azienda Ospedaliera G. Brotzu            | Struttura Complessa di Diabetologia                                                 | Cagliari (CA)             |
| SARDEGNA | Alessandra Boi , Chiara Serafini, Sandro Cocco, Rossana Farci, Paola Elisa Meloni, Sergio Corsini, Lucia Milia, Assunta Poggi, Nada Richterova, Loredana Marongiu, Antonella Vanni , Giacomo Guaita               | Presidio Ospedaliero Sirai -ASSL Carbonia - ATS Sardegna      | Servizio di Diabetologia                                                            | Carbonia (SU)             |
| SARDEGNA | Ilaria Pelligra, Giacomo Guaita ,                                                                                                                                                                                 | Ospedale Santa Barbara                                        | Servizio Diabetologia Iglesias                                                      | Iglesias (SU)             |

| REGIONE  | AUTORI                                                                                                                                                                                                                          | OSPEDALE                                                                           | REPARTO                                                               | CITTA'           |
|----------|---------------------------------------------------------------------------------------------------------------------------------------------------------------------------------------------------------------------------------|------------------------------------------------------------------------------------|-----------------------------------------------------------------------|------------------|
|          | Cinzia Deias, Enzo Tuveri, Anna Maria Cardia , Fanny Marcello, Stefania Leoni, Graziella Angius, Emiliano Rosina, Gianfranco Orrù , Giuseppe Correale                                                                           |                                                                                    |                                                                       |                  |
| SARDEGNA | Maria Antonietta Fois, Laura Perra, Ada Pilia, Rosa Pilia, Giuliana Cao , Ada Pilia, Rosa Pilia, Giuliana Cao                                                                                                                   | ATS Sardegna ASSL Cagliari - Distretto di Sarcidano - Barbagia di Seulo e Trexenta | Servizio Territoriale Diabetologia di ISILI                           | Isili (CA)       |
| SARDEGNA | Gisella Meloni, Maria Grazia Pani, Giacomo Marini, Claudia Putzu, Gilda Luisa Usala, Ornella Casula, Liliana Cerina, Andrea Cabiddu                                                                                             | ATS Sardegna - ASSL Lanusei                                                        | UO Diabetologia e Malattie Metaboliche                                | Lanusei (NU)     |
| SARDEGNA | Luciana Maria Careddu, Giuseppina Gattu, Giacomo Marini , Paola Masala, Anna Franca Muroi, Alessia Prinzi, Liliana Sanna, Luisa Sollai, Paolo Giuseppe Michele Bianco                                                           | ASL Nuoro - Poliambulatorio Macomer                                                | Ambulatorio di Diabetologia                                           | Macomer (NU)     |
| SARDEGNA | Ef시오 Cossu, Elena Loy, Marta Tuveri, Diego Mastino, Silvana Serra, Manuela Cauli, Giovanna Fabiana Zedda, Assunta Stella Belgiorno, Nisella Murtas                                                                              | Azienda Ospedaliera Universitaria di Cagliari - Policlinico D. Casula              | SSD Diabetologia                                                      | Monsserrato (CA) |
| SARDEGNA | Alfonso Gigante, Serra Talia, Polo Rosalia , Bianco Paolo Giuseppe Michele , Cozzolino Sestilia, Sollai Luisa, Marteddu Liliana, Soro Alessandra, Ruiu Antonella, Pira Bastianina, Addis Alessandra, Litterio Lorella , Salaris | Ospedale C. Zonchello                                                              | Struttura Semplice Dipartimentale Malattie Metaboliche - Diabetologia | Nuoro (NU)       |

| REGIONE  | AUTORI                                                                                                                                                                                                                                      | OSPEDALE                                                                 | REPARTO                                                                 | CITTA'                      |
|----------|---------------------------------------------------------------------------------------------------------------------------------------------------------------------------------------------------------------------------------------------|--------------------------------------------------------------------------|-------------------------------------------------------------------------|-----------------------------|
|          | Daniela, Isoni Serena,<br>Cirillo Elisabetta                                                                                                                                                                                                |                                                                          |                                                                         |                             |
| SARDEGNA | Sara Cherchi , Maria<br>Filippina Angius ,<br>Rosanna Vacca , Giulia<br>Bacciu, Giancarlo<br>Tonolo                                                                                                                                         | ASL 2 Olbia - PO San<br>Giovanni di Dio                                  | S.C. Aziendale<br>Diabetologia                                          | Olbia (OT)                  |
| SARDEGNA | Concetta Clausi,<br>Giuseppina Frau,<br>Marco Mastinu, Luisa<br>Sechi, Zoccheddu<br>Simonetta, Melis<br>Giuseppina                                                                                                                          | ASL Oristano -<br>Ospedale San Martino                                   | UO Malattie<br>Metaboliche e<br>Diabetologia                            | Oristano (SS)               |
| SARDEGNA | Maria Antonietta<br>Cambosu                                                                                                                                                                                                                 | ASL Nuoro                                                                | Polimambulatorio di<br>Diabetologia- Distretto<br>di Siniscola - Orosei | Orosei (NU)                 |
| SARDEGNA | Marco Mameli                                                                                                                                                                                                                                | DISTRETTO<br>SANITARIO DI<br>SASSARI - ASSL<br>SASSARI - AST<br>SARDEGNA | SERVIZIO DI<br>DIABETOLOGIA -<br>POLIAMBULATORI<br>O DI PORTO<br>TORRES | PORTO TORRES (SS)           |
| SARDEGNA | Fernando Farci,<br>Mariangela Ghiani,<br>Rossella Cau, Maurizio<br>Sparano, Danila Pistis,<br>Anna Antonelli, Evelin<br>Pandolfi, Valeria<br>Tavolacci, Annalisa<br>Cogoni, Maria<br>Maddalena Pitturru                                     | ATS Sardegna - ASSL<br>Cagliari                                          | UO Diabetologia<br>Distretto di Quartu -<br>Parteolla                   | Quartu Sant'Elena<br>(CA)   |
| SARDEGNA | Raffaella Derai,<br>Marina Armeni, Chiara<br>Satta, Cira Lombardo,<br>Martina Melis,<br>Stefania Casula,<br>Vincenzo Sica, Maria<br>Rosaria Meloni,<br>Simonetta Mamusa,<br>Riccarda Garau, Maria<br>Antonietta Pisano,<br>Elisabetta Cossu | ASL Sanluri Ospedale<br>Nostra Signora di<br>Bonaria                     | Diabetologia e Malattie<br>Metaboliche                                  | San Gavino Monreale<br>(VS) |
| SARDEGNA | Alessandro Gentilini,<br>Adolfo Pacifico, Pietro<br>Fresu, Antonello<br>Carboni , Tiziana<br>Congiu, Margherita<br>Idda, Angelo Fancellu                                                                                                    | ATS Sardegna -<br>ASSL1-Sassari-<br>Distretto Di Sassari                 | Struttura Semplice di<br>Diabetologia e Malattie<br>Del Metabolismo     | Sassari (SS)                |
| SARDEGNA | Alessio Lai, Stefania                                                                                                                                                                                                                       | ATS Sardegna                                                             | Ambulatorio di                                                          | Senorbi (CA)                |



| REGIONE  | AUTORI                                                                               | OSPEDALE                                                                     | REPARTO                                                              | CITTA'               |
|----------|--------------------------------------------------------------------------------------|------------------------------------------------------------------------------|----------------------------------------------------------------------|----------------------|
|          | Deiana, Tiziana<br>Mudadu                                                            |                                                                              | Diabetologia -<br>Poliambulatori di<br>Senorbi                       |                      |
| SARDEGNA | Maria Antonietta<br>Cambosu                                                          | Poliambulatorio di<br>Siniscola ASL Nuoro                                    | Poliambulatorio di<br>Diabetologia- Distretto<br>di Siniscola-Orosei | Siniscola (NU)       |
| SARDEGNA | Jacopo Salvatore<br>Bulla, Giuseppina<br>Gattu                                       | ASL 3 Nuoro -<br>Distretto Sanitario Di<br>Sorgono - Ospedale<br>San Camillo | Servizio Diabetologia                                                | Sorgono (NU)         |
| SARDEGNA | Fabrizia Caucci                                                                      | Distretto di Sassari                                                         | Polimabulatorio San<br>Camillo - Diabetologia                        | Sorso - Sassari (SS) |
| SARDEGNA | Maria Chiara Cocco                                                                   | Distretto Sanitario di<br>Sarrabus Gerrei ASL 8<br>Cagliari                  | Ambulatorio<br>Diabetologia<br>Villasimius                           | Villasimius (CA)     |
| SICILIA  | Maurizio Di Mauro,<br>Marco Di Mauro,<br>Carmelo D'Urso, Maria<br>Concetta Giuffrida | AOU Policlinico<br>Vittorio Emanuele -<br>P.O. Gaspare Rodolico              | Centro diabetologico                                                 | Catania (CT)         |
| SICILIA  | Lucia Frittitta, Laura<br>Sciacca , Agostino<br>Milluzzo , Teresa<br>Ballirò         | ARNAS Garibardi<br>P.O. Garibaldi Nesima                                     | UOSD Centro<br>antidiabetico e per il<br>trattamento<br>dell'Obesità | Catania (CT)         |
| SICILIA  | Concetta Gatta,<br>Caterina Merendino                                                | A.Ospedaliero<br>-Universitaria<br>Policlinico San Marco                     | Divisione di Medicina<br>Generale Presidio San<br>Marco              | Catania (CT)         |
| SICILIA  | Antonietta Maria<br>Scarpitta, Antonino Lo<br>Presti                                 | P.O. Paolo Borsellino<br>Marsala - A.S.P.<br>Trapani                         | U.O.C Di Diabetologia<br>e Malattie Metaboliche<br>7 Piano           | Marsala (TP)         |
| SICILIA  | Giuseppina Russo,<br>Annalisa Giandalia                                              | A.O.U. Policlinico<br>Universitario G.<br>Martino                            | U.O.C. Medicina<br>Interna - Malattie<br>Metaboliche                 | Messina (ME)         |
| SICILIA  | Giuseppe Mattina                                                                     | PTA Biondo                                                                   | Ambulatorio di<br>Diabetologia                                       | PALERMO (PA)         |
| SICILIA  | Giuseppe Mattina,<br>Giuseppe Mattina                                                | PTA Palermo Centro                                                           | Poliambulatorio di<br>Diabetologia                                   | Palermo (PA)         |
| SICILIA  | Giovanni Saitta                                                                      | Azienda Sanitaria<br>Provinciale Di Messina                                  | Poliambulatorio<br>Distretto di Messina                              | Pistunina (ME)       |
| SICILIA  | Vittoria Sesta                                                                       | ASP 8 Siracusa<br>Ospedale Rizza                                             | Poliambulatorio di<br>Diabetologia                                   | Siracusa (SR)        |
| TOSCANA  | Giovanna Gregori,<br>Fabio Baccetti, Isabella<br>Crisci, Mary Mori                   | Centro<br>Polispecialistico<br>Monterosso                                    | SSD Diabetologia                                                     | Carrara (MS)         |
| TOSCANA  | Paola Orsini, Graziano                                                               | Ospedale Cecina                                                              | Diabetologia                                                         | Cecina (LI)          |

| REGIONE | AUTORI                                                                                                                                                                                    | OSPEDALE                                                 | REPARTO                                         | CITTA'                |
|---------|-------------------------------------------------------------------------------------------------------------------------------------------------------------------------------------------|----------------------------------------------------------|-------------------------------------------------|-----------------------|
|         | Di Cianni                                                                                                                                                                                 |                                                          |                                                 |                       |
| TOSCANA | Loredana Rizzo,<br>Giovanni De Gennaro,<br>Walter Baronti, Laura<br>Sambuco                                                                                                               | Azienda USL Toscana<br>Sud Est P.O.<br>Misericordia      | U.O.C. Diabetologia                             | Grosseto (GR)         |
| TOSCANA | Stefania Bertoli,<br>Margherita Occhipinti,<br>Sabrina Cosimi                                                                                                                             | AUSL Toscana Nord<br>Ovest - Ospedale<br>Versilia        | Reparto di<br>Diabetologia                      | Lido di Camaiore (LU) |
| TOSCANA | Graziano Di Cianni,<br>Paola Orsini, Graziano<br>Di Cianni, Francesca<br>Pancani, Emilia<br>Lacaria, Giuseppe<br>Viccica, Anna Turco                                                      | ASL Toscana Nord<br>Ovest                                | U.O.C. Diabetologia                             | Livorno (LI)          |
| TOSCANA | Alberto Di Carlo, Ilaria<br>Casadidio, Ilaria<br>Cuccuru, Cristina<br>Lencioni                                                                                                            | Ospedale Campo di<br>Marte - AUSL Toscana<br>Nord Ovest  | Diabetologia e Malattie<br>Metaboliche          | Lucca (LU)            |
| TOSCANA | Elisabetta Salutini,<br>Claudia Cosentino,<br>Anna Tedeschi,<br>Roberto Anichini, Viti<br>Secondina, Alice<br>Valeria Magiar                                                              | Ospedale Cosma<br>Damiano                                | UO Diabetologia Area<br>Pistoiese               | Pescia (PT)           |
| TOSCANA | Graziano Di Cianni                                                                                                                                                                        | Ospedale Villa Marina<br>di Piombino - USL 6<br>Livorno  | Sezione Diabetologia -<br>U.O. Medicina Interna | Piombino (LI)         |
| TOSCANA | Elisabetta Salutini,<br>Claudia Cosentino,<br>Anna Tedeschi,<br>Roberto Anichini,<br>Secondina Viti, Alice<br>Valeria Magiar                                                              | Ospedale San Jacopo                                      | UO Diabetologia Area<br>Pistoiese               | Pistoia (PT)          |
| TOSCANA | Graziano Di Cianni,<br>Paola Orsini, Laura<br>Bini                                                                                                                                        | Ospedale di Pontedera                                    | Servizio di<br>Diabetologia Pontedera           | Pontedera (PI)        |
| TOSCANA | Graziano Di Cianni,<br>Paola Orsini                                                                                                                                                       | Ospedale di<br>Portoferrario                             | Reparto di<br>Diabetologia                      | Portoferrario (LI)    |
| TOSCANA | Maria Calabrese,<br>Caterina Lamanna,<br>Marta Seghieri, Lucia<br>Ianni, Monica<br>Lorenzetti, Angela<br>Marsocci, Sandra<br>Guizzotti, Pamela<br>Luccarini, Ylenia<br>Vignoli, Graziella | Presidio Misericordia e<br>Dolce - USL Toscana<br>Centro | UOSD Diabetologia                               | Prato (PO)            |

| REGIONE             | AUTORI                                                                                                                                | OSPEDALE                                                  | REPARTO                                                               | CITTA'                  |
|---------------------|---------------------------------------------------------------------------------------------------------------------------------------|-----------------------------------------------------------|-----------------------------------------------------------------------|-------------------------|
|                     | Scarcella, Carmelina Amendola                                                                                                         |                                                           |                                                                       |                         |
| TOSCANA             | Graziano Di Cianni, Paola Orsini, Maria Norpoth                                                                                       | Ospedale di Volterra                                      | Servizio di Diabetologia Volterra                                     | Volterra (PI)           |
| TRENTINO ALTO ADIGE | Bruno Fattor, Tiziano Monauni, Dalia Crazzolara, Ilaria Rubbo, Michela Cristini, Marco Dauriz, Roberta Endrighi                       | Ospedale Centrale di Bolzano                              | Servizio di Diabetologia                                              | Bolzano (BZ)            |
| TRENTINO ALTO ADIGE | Stefano Garavelli, Luisella Perina, Paola Marini, Sandro Inchiostro                                                                   | APSS Ospedale S. Lorenzo di Borgo Valsugana               | Centri Diabetologici di Borgo Valsugana, Pergine Valsugana e Primiero | Borgo Valsugana (TN)    |
| TRENTINO ALTO ADIGE | Giuseppe Cheluci, Susi Martucci, Miriam Spadaro                                                                                       | Ospedale di Cavalese                                      | UO Medicina                                                           | Cavalese (TN)           |
| TRENTINO ALTO ADIGE | Florian Hermann Woehs, Giampiero Incelli, Christoph Pircher                                                                           | Ospedale Tappeiner                                        | Servizio Di Diabetologia                                              | Merano (BZ)             |
| TRENTINO ALTO ADIGE | Lorena De Moliner, Marlene Dall'Alda, Mariana Peroni, Katja Speese, Fabiola Frisinghelli, Ilaria Fait, Chiara Mazzucchi               | Ospedale Santa Maria del Carmine di Rovereto              | Ambulatorio di Diabetologia                                           | Rovereto (TN)           |
| TRENTINO ALTO ADIGE | Massimo Orrasch, Francesca Zambotti, Tiziano Lucianer, Bruna Barcatta, Silvia Clementi, Roberta Fellin, Cristina Faes, Ilaria Nicolao | APSS Trento Ospedale Santa Chiara Poliambulatorio Crosina | Centro Diabetologica                                                  | Trento (TN)             |
| UMBRIA              | Marisa Proietti                                                                                                                       | Azienda USL 2 Umbria                                      | U.O. Diabetologia Amelia                                              | Amelia (TR)             |
| UMBRIA              | Roberto Norgiolini, Viviana Minarelli, Antonio Mastroianni, Catuscia Tamburi                                                          | Ospedale Civile Citta' di Castello                        | S.S. di Diabetologia                                                  | Citta' di Castello (PG) |
| UMBRIA              | Maria Luisa Picchio, Chiara Pascucci, Francesca Cammilleri, Antonella Monni, Fabio Scarlato, Maria Cristina Celli                     | Centro di Salute Sede di Foligno ASL 2 dell' Umbria       | Servizio di Diabetologia                                              | Foligno (PG)            |

| REGIONE       | AUTORI                                                                                                                                                                                                                                                     | OSPEDALE                                           | REPARTO                                                                   | CITTA'         |
|---------------|------------------------------------------------------------------------------------------------------------------------------------------------------------------------------------------------------------------------------------------------------------|----------------------------------------------------|---------------------------------------------------------------------------|----------------|
| UMBRIA        | Cecilia Marino, Silvia Arnone, Annarita Petrelli, Antonio Mastroianni                                                                                                                                                                                      | USL Umbria 1<br>Ospedale Branca di Gubbio          | Servizio Diabetologia dell'Alto Chiascio                                  | Gubbio (PG)    |
| UMBRIA        | Massimo Bracaccia, Elisabetta Mandosi, Marco Tonelli                                                                                                                                                                                                       | Azienda USL Umbria 2                               | U.O. Diabetologia                                                         | Orvieto (TR)   |
| UMBRIA        | Elisabetta Torlone, Carmine Fanelli, Francesca Porcellati, Simone Pampanelli, Gabriele Perriello, Giuseppe Murdolo, Cristiana Vermigli, Nadia Biccari, Elisa Donnini, Valeriana Grassini, Maria Teresa Sulpizi, Francesca Mazzasette, Francesca Porcellati | Azienda Ospedaliera Santa Maria della Misericordia | SC Endocrinologia e Malattie del Metabolismo                              | Pereugia (PG)  |
| UMBRIA        | Paola Del Sindaco, Franca Ambrosi, Silvia Arnone, Luca Barbanera, Silvia Bellavita, Marinella Biagini, Sara Calandro, Roberta Celleno, Chiara Di Loreto, Ivonne Ghilardi, Debora Pezzuto, Laura Piastrella, Catuscia Tamburi                               | USL 1 Umbria                                       | UOS Diabetologia Distretto Del Perugino                                   | Perugia (PG)   |
| UMBRIA        | Carlo Lalli, Francesca Cammilleri, Monia Cintio, Luca Sotgiu, Fabio Scarlato, Maura Scarponi                                                                                                                                                               | Distretto di Spoleto<br>ASL 2 Umbria.              | Servizio di diabetologia Poliambulatori Distrettuali                      | Spoleto (PG)   |
| UMBRIA        | Benedetta Carinella                                                                                                                                                                                                                                        | Azienda USL Umbria 2                               | U.O. Diabetologia                                                         | Terni (TR)     |
| VALLE D'AOSTA | Giulio Doveri, Emma Lillaz                                                                                                                                                                                                                                 | Ospedale Regionale Umberto Parini                  | Ambulatori di Medicina-Diabetologia                                       | Aosta (AO)     |
| VENETO        |                                                                                                                                                                                                                                                            | Presidio Ospedaliero di Agordo                     | Medicina e Lungodegenza - Ambulatorio di Diabetologia Segreteria Medicina | Agordo (BL)    |
| VENETO        | Simonetta Lombardi, Daniele Raimondo,                                                                                                                                                                                                                      | Distretto Ovest (Arzignano, Valdagno,              | UOSD di Diabetologia ed Endocrinologia                                    | Arzignano (VI) |

| REGIONE | AUTORI                                                                                                                                                                                                                  | OSPEDALE                                                 | REPARTO                                   | CITTA'                   |
|---------|-------------------------------------------------------------------------------------------------------------------------------------------------------------------------------------------------------------------------|----------------------------------------------------------|-------------------------------------------|--------------------------|
|         | Chiara Tommasi, Giovanni Romanello, Silvia Burlina, Dario Cioccoloni, Sabrina Cozza, Serena Sarti, Marta Binotto, Isabella Mecenero, Eliana Scott, Vilma Massariol, Alessia Fracca, Andrea Guiotto, Giovanna Tommasetto | Montecchio Maggiore, Lonigo)- ULSS 8 Berica              | Territoriale                              |                          |
| VENETO  | Alberto Marangoni, Sara Balzano, Rachele Scotton, Maria Ferrari, Alessandro Pianta                                                                                                                                      | Ospedale Bassiano                                        | Centro Antidiabetico                      | Bassano Del Grappa (VI)  |
| VENETO  | Corradina Alagona, Massimo Boaretto, Michela Da Rold, Claudia Cibien, Isabella Famà                                                                                                                                     | ULSS 1 Dolomiti, Presidio Ospedaliero San Martino        | UOS Diabetologia                          | Belluno (BL)             |
| VENETO  | Lucia Bondesan, Cristina Bittante                                                                                                                                                                                       | ASL 21 CAD Bovolone                                      | Diabetologia                              | Bovolone (VR)            |
| VENETO  | Daniela Di Sarra                                                                                                                                                                                                        | Poliambulatori Ospedale di Bussolengo - AULSS 9          | UO di Medicina                            | Bussolengo (VR)          |
| VENETO  | Narciso Marin, Alessandra Cosma, Rachele Scotton, Sabrina Battagin, Antonella Maria Di Lucia , Catia Flori, Alessandro Bergamin, Moraika Riggi, Anna Pisacane, Agostino Paccagnella, Maria Lisa Marcon, Simone Girardin | Ospedale San Giacomo Apostolo - AULSS 2 Marca Trevigiana | UOS di Diabetologia                       | Castelfranco Veneto (TV) |
| VENETO  | Andrea Nogara, Viola Sanga, Silvia Di Benedetto                                                                                                                                                                         | Ospedale Civile di Chioggia ULSS 3 (ex ULSS 14)          | UOSD Diabetologia e malattie del Ricambio | Chioggia (VE)            |
| VENETO  | Vera Frison, Anna Coracina, Michela Bettio, Alessio Filippi, Nino Cristiano Chilelli, Marco Grasso, Laura Tessarollo, Giuliana Taffarello, Felicia Abascia' , Sabrina                                                   | Presidio ospedaliero di cittadella, ulss 6 euganea       | UOSD Diabetologia                         | Cittadella (PD)          |

| REGIONE | AUTORI                                                                                                                                                                                                                                                                                                                                 | OSPEDALE                                              | REPARTO                                       | CITTA'                 |
|---------|----------------------------------------------------------------------------------------------------------------------------------------------------------------------------------------------------------------------------------------------------------------------------------------------------------------------------------------|-------------------------------------------------------|-----------------------------------------------|------------------------|
|         | Cappellato, Emanuela<br>Agostini, Silvia<br>Convertini, Lisa<br>Mason, Sandra<br>Settimo, Isabella<br>Zarantonello                                                                                                                                                                                                                     |                                                       |                                               |                        |
| VENETO  | Agostino Paccagella,<br>Laura Nollino, Maria<br>Sambataro, Sabina<br>Marchetto , Maria Sara<br>Persano, Barbara<br>Almoto, Andrea Dotto,<br>Teresa Benvenuti,<br>Claudia Vigo,<br>Marialisa Marcon,<br>Annalisa Tittonel,<br>Chiara Zanco, Federica<br>Bianchin, Clementina<br>Bravin, Federica<br>Zambon, Sonia Sacco,<br>Karen Brown | Presidio di Conegliano<br>- USLS 7 Pieve di<br>Soligo | UOSD Diabetologia                             | Conegliano (TV)        |
| VENETO  | Michele D'Ambrosio,<br>Federica Tadiotto,<br>Virgilio Da Tos                                                                                                                                                                                                                                                                           | Ulss 6 Euganea<br>Ospedale di Conselve                | Centro U.O.S.D.<br>Diabetologia               | Conselve (PD)          |
| VENETO  | Maria Luisa Contin,<br>Angela Pia De Cata,<br>Isabella Negro, Iessica<br>Iacovacci, Martina<br>Colcera, Nicoletta<br>Panzonato                                                                                                                                                                                                         | Ospedale di Dolo                                      | Servizio di<br>Diabetologia                   | Dolo (VE)              |
| VENETO  | Ferruccio D'Incau,<br>Anna Altomari,<br>Antonio Volpi                                                                                                                                                                                                                                                                                  | Ospedale S. Maria del<br>Prato - ULSS 2 - Feltre      | UOS Diabetologia                              | Feltre (BL)            |
| VENETO  | Daniela Di Sarra                                                                                                                                                                                                                                                                                                                       | Poliambulatori<br>Ospedale Isola -<br>AULSS 9         | CAD Ospedale Isola<br>della Scala             | Isola della Scala (VR) |
| VENETO  | Carmela Vinci, Valeria<br>Vallone                                                                                                                                                                                                                                                                                                      | Ospedale di Jesolo -<br>ASL n.10 Veneto<br>Orientale  | UOSD Diabetologia                             | Jesolo (VE)            |
| VENETO  | Lucia Bondesan,<br>Cristina Bittante,<br>Giulia Ceradini                                                                                                                                                                                                                                                                               | ASL0 21 Verona CAD<br>Legnago                         | Reparto di Medicina                           | Legnago (VR)           |
| VENETO  | Manuela Moise',<br>Donata Barison                                                                                                                                                                                                                                                                                                      | Distretto 2 ASL 3<br>Serenissima                      | Ambulatorio di<br>Diabetologia<br>Distretto 2 | Mestre (VE)            |
| VENETO  | Michele D'Ambrosio,<br>Federica Tadiotto,<br>Virgilio Da Tos,                                                                                                                                                                                                                                                                          | Ulss 6 Euganea                                        | U.O.S.D. diabetologia                         | Monselice (PD)         |

| REGIONE | AUTORI                                                                                                                                                                                                                                                                                                              | OSPEDALE                                                                 | REPARTO                                                          | CITTA'                    |
|---------|---------------------------------------------------------------------------------------------------------------------------------------------------------------------------------------------------------------------------------------------------------------------------------------------------------------------|--------------------------------------------------------------------------|------------------------------------------------------------------|---------------------------|
|         | Monica Saoncella                                                                                                                                                                                                                                                                                                    |                                                                          |                                                                  |                           |
| VENETO  | Michele D'Ambrosio,<br>Federica Tadiotto,<br>Virgilio Da Tos,<br>Monica Saoncella                                                                                                                                                                                                                                   | Ulss 6 Euganea<br>Ospedale di<br>Montagnana                              | Centro U.O.S.D.<br>Diabetologia                                  | Montagnana (PD)           |
| VENETO  | Narciso Marin,<br>Alessandra Cosma,<br>Rachele Scotton, Elisa<br>Baldasso, Ivana<br>Martini, Maria Zanatta,<br>Lucia Favero,<br>Espartaco Rigo, Maria<br>Teresa Semenzin,<br>Agostino Paccagnella,<br>Maria Lisa Marcon,<br>Simone Girardin                                                                         | Presidio Ospedaliero di<br>Montebelluna -<br>AULSS 2 Marca<br>Trevigiana | UOS di Diabetologia                                              | Montebelluna (TV)         |
| VENETO  | Luciano Zenari,<br>Lorenzo Bertolini,<br>Francesca Grippaldi,<br>Claudia Sorgato,<br>Barbara Maistri                                                                                                                                                                                                                | Ospedale Sacro Cuore<br>Don. Calabria                                    | U.O. di Diabetologia<br>(6 piano)                                | Negrar (VR)               |
| VENETO  | Maria Luisa Contin ,<br>Michela Dal Pos,<br>Martina Aldrigo,<br>Barbara Centenaro,<br>Loris Bortolato,<br>Nicoletta Bussola                                                                                                                                                                                         | USL 13 di Mirano<br>Ospedale di Noale                                    | Servizio di<br>Diabetologia di Noale                             | Noale (VE)                |
| VENETO  | Lucia Bondesan,<br>Marques Alessandra                                                                                                                                                                                                                                                                               | ASL 21 CAD Nogara                                                        | Reparto di Medicina                                              | Nogara (VR)               |
| VENETO  | Maria Simoncini,<br>Marco Strazzabosco                                                                                                                                                                                                                                                                              | Ospedale Milani                                                          | Ambulatorio<br>Diabetologico                                     | Noventa Vicentina<br>(VI) |
| VENETO  | Gian Paolo Fadini,<br>Alberto Maran, Saula<br>Vigili De<br>Kreutzenberg,<br>Benedetta Maria<br>Bonora, Mario Luca<br>Moriari, Nicola Vitturi,<br>Cristina Crepaldi,<br>Monica Vedovato,<br>Daniela Bruttomesso,<br>Federico Boscari,<br>Mauro Rigato, Andrea<br>Bruttocao, Gabriella<br>Guarneri, Angelo<br>Avogaro | Azienda Ospedaliera di<br>Padova                                         | Dipartimento di<br>Medicina - UOC<br>Malattie del<br>Metabolismo | Padova (PD)               |
| VENETO  | Annunziata Lapolla,<br>Francesco Piarulli,                                                                                                                                                                                                                                                                          | Universita' degli Studi<br>di Padova - UOC                               | UOC di Diabetologia e<br>Dietetica                               | Padova (PD)               |

| REGIONE | AUTORI                                                                                                                                                         | OSPEDALE                                                        | REPARTO                                                           | CITTA'                    |
|---------|----------------------------------------------------------------------------------------------------------------------------------------------------------------|-----------------------------------------------------------------|-------------------------------------------------------------------|---------------------------|
|         | Giovanni Sartore, Giuseppe Bax , Maria Grazia Dalfrà, Michela Masin , Silvia Minardi, Alessandra Gallo , Barbara Bonsembiante , Isabella Negro, Silvia Longhin | Diabetologia e Dietetica USL 16 Padova                          |                                                                   |                           |
| VENETO  |                                                                                                                                                                | Ospedale di Pieve di Cadore                                     | UO di Medicina - Servizio di Diabetologia                         | Pieve di Cadore (BL)      |
| VENETO  | Cristiano Fongher                                                                                                                                              | Casa di Cura Madonna della Salute - ULSS 5                      | Ambulatorio di Diabetologia                                       | Porto Viro (RO)           |
| VENETO  | Carmela Vinci, Isabella Massimina Colletti, Milena Sira Zanon, Michela Signorato, Anna Del Bianco, Antonella Garro                                             | ASL 10 Veneto Orientale Ospedale di Portogruaro                 | UOSD Diabetologia                                                 | Portogruaro (VE)          |
| VENETO  | Carmela Vinci, Valeria Vallone, Jessica Cristaldi, Antonio De Mitri, Cristina Toffolo                                                                          | Ospedale S. Dona Di Piave ASL 10 Veneto Orientale               | Servizio di Diabetologia                                          | San. Donà Di Piave (VE)   |
| VENETO  | Silvana Costa, Marco Strazzabosco                                                                                                                              | Ospedale Territoriale di Sandrigo                               | Ambulatorio Diabetologico                                         | Sandrigo (VI)             |
| VENETO  | Francesco Calcaterra, Antonella Senesi, Marina Miola, Francesca Dal Molin, Giulia Faccin, Chiara Trappolin                                                     | Casa della Salute di Schio                                      | U.O. Diabetologia Endocrinologia Dietetica                        | Schio (VI)                |
| VENETO  | Lucia Gottardo, Valentina Mariano                                                                                                                              | AULSS 3 Serenissima - Ospedale SS Giovanni e Paolo              | UOSD Iperensione e Patologie Endocrino Metaboliche e Angiologiche | Venezia (VE)              |
| VENETO  | Elisabetta Brun, Maria Simoncini, Chiara Alberta Mesturino, Consuelo Grigoletto, Silvana Costa, Marco Strazzabosco                                             | Ospedale San Bortolo -ULSS 6 Vicenza                            | U.O. Endocrinologia e Malattie del Metabolismo                    | Vicenza (VI)              |
| VENETO  | Daniela Di Sarra                                                                                                                                               | CAD Villafranca - Poliambulatori Ospedale Villafranca - AULSS 9 | CAD Villa Franca                                                  | Villafranca Veronese (VR) |
| VENETO  | Lucia Bondesan                                                                                                                                                 | ASL 21 CAD Zevio                                                | Centro Antidiabetico                                              | Zevio (VR)                |
